1  
2  
3  
4  
5  
6  
7  
8  
9  
10  
11  
12  
13  
14  
15  
16  
17  
18  
19  
20  
21  
22  
23  
24  
25  
26  
27  
28

## Circadian control of intrinsic heart rate via a sinus node clock and the pacemaker channel

Yanwen Wang BSc, PhD<sup>1</sup>; Servé Olieslagers BSc<sup>2</sup>; Anne Berit Johnsen BSc, PhD<sup>3</sup>;

Svetlana Mastitskaya BSc, PhD<sup>4</sup>; Haibo Ni MSc<sup>5</sup>; Yu Zhang BSc, PhD<sup>1</sup>;

Nicholas Black BM BCh (Oxon)<sup>1</sup>; Cali Anderson BSc<sup>1</sup>; Charlotte Cox MRes<sup>1</sup>;

Annalisa Bucchi BSc, PhD<sup>6</sup>; Sven Wegner MD, PhD<sup>7</sup>; Beatriz Bano-Otalora BSc, PhD<sup>7</sup>;

Cheryl Petit MRes<sup>7</sup>; Eleanor Gill MRes<sup>1</sup>; Sunil Jit Logantha BPharm, MSc, PhD<sup>1</sup>;

Nick Ashton BSc, PhD<sup>1</sup>; George Hart DM, FRCP<sup>1</sup>; Henggui Zhang BSc, PhD<sup>5</sup>;

Elizabeth Cartwright BSc, PhD<sup>1</sup>; Ulrik Wisloff BSc, PhD<sup>3</sup>; Paula Da Costa Martins BSc, PhD<sup>2</sup>;

Dario DiFrancesco BSc, PhD<sup>6</sup>; Halina Dobrzynski BSc, PhD<sup>1</sup>;

Hugh D. Piggins BSc, PhD<sup>7</sup>; Mark R. Boyett BSc, PhD, FSB, FRCP\*<sup>†1</sup>; Alicia D'Souza BSc, PhD<sup>†1</sup>

<sup>†</sup>Joint senior authors

<sup>1</sup>Division of Cardiovascular Sciences, University of Manchester, UK. <sup>2</sup>Faculty of Health, Medicine and Life Science, Maastricht University, Netherlands. <sup>3</sup>Department of Circulation and Medical Imaging, Norwegian University of Science and Technology, Norway. <sup>4</sup>Neuroscience, Physiology and Pharmacology, University College London, UK. <sup>5</sup>School of Physics and Astronomy, University of Manchester, UK. <sup>6</sup>Department of Biosciences, University of Milan, Italy. <sup>7</sup>Division of Diabetes, Endocrinology and Gastroenterology, University of Manchester

**\*Corresponding author:** Professor Mark R. Boyett; Division of Cardiovascular Sciences, University of Manchester, 46 Grafton Street, Manchester M13 9NT, UK

Tel: +44 161 275 1192 Fax: +44 161 275 1183 Email: [mark.boyett@manchester.ac.uk](mailto:mark.boyett@manchester.ac.uk)

29 **ABSTRACT**

30 In the human, there is a circadian rhythm in the resting heart rate and it is higher during the day in  
31 preparation for physical activity. Conversely, slow heart rhythms (bradyarrhythmias) occur primarily  
32 at night. Although the lower heart rate at night is widely assumed to be neural in origin (the result  
33 of high vagal tone), the objective of the study was to test whether there is an *intrinsic* change in  
34 heart rate driven by a local circadian clock. In the mouse, there was a circadian rhythm in the heart  
35 rate *in vivo* in the conscious telemetrized animal, but there was also a circadian rhythm in the  
36 intrinsic heart rate in denervated preparations: the Langendorff-perfused heart and isolated sinus  
37 node. In the sinus node, experiments (qPCR and bioluminescence recordings in mice with a *Per1*  
38 luciferase reporter) revealed functioning canonical clock genes, e.g. *Bmal1* and *Per1*. We identified  
39 a circadian rhythm in the expression of key ion channels, notably the pacemaker channel *Hcn4*  
40 (mRNA and protein) and the corresponding ionic current (funny current, measured by whole cell  
41 patch clamp in isolated sinus node cells). Block of funny current in the isolated sinus node  
42 abolished the circadian rhythm in the intrinsic heart rate. Incapacitating the local clock (by cardiac-  
43 specific knockout of *Bmal1*) abolished the normal circadian rhythm of *Hcn4*, funny current and the  
44 intrinsic heart rate. Chromatin immunoprecipitation demonstrated that *Hcn4* is a transcriptional  
45 target of BMAL1 establishing a pathway by which the local clock can regulate heart rate. In  
46 conclusion, there is a circadian rhythm in the intrinsic heart rate as a result of a local circadian  
47 clock in the sinus node that drives rhythmic expression of *Hcn4*. The data reveal a novel regulator  
48 of heart rate and mechanistic insight into the occurrence of bradyarrhythmias at night.

49 Living things including humans are attuned to the 24 h day-night cycle and many biological  
50 processes exhibit an intrinsic ~24 h (i.e. circadian) rhythm. In the human, the resting heart rate (in  
51 the absence of physical activity) shows a circadian rhythm and is higher during the day when we  
52 are awake<sup>1,2</sup>. The heart is therefore primed, anticipating the increase in demand during the awake  
53 period. Conversely, bradyarrhythmias primarily occur at night<sup>1,3</sup>. Previously, the circadian rhythm in  
54 heart rate *in vivo* has been attributed to the autonomic nervous system: to high sympathetic nerve  
55 activity accompanying physical activity during the awake period and high vagal tone during the  
56 sleep period<sup>4</sup>. This is partly based on heart rate variability as a surrogate measure of autonomic  
57 tone<sup>5-7</sup>; however, we have shown that heart rate variability cannot be used in any simple way as a  
58 measure of autonomic tone<sup>8</sup>. Therefore, the mechanism underlying the circadian rhythm in heart  
59 rate is still unknown. We asked the question whether there is a circadian rhythm in the *intrinsic*  
60 heart rate set by the pacemaker of the heart, the sinus node.

61 In a cohort of nine mice, ECG telemetry *in vivo* showed a circadian rhythm in mean heart  
62 rate and other electrophysiological parameters (PR interval, QRS duration and QT interval) during  
63 a 12 h light:12 h dark lighting regime, and circadian rhythms in these parameters were sustained  
64 when the mice were placed in constant dark conditions (Figure 1). A circadian rhythm in heart rate,  
65 PR interval, QRS duration and QT interval are also observed in the human<sup>7,9-11</sup>. Mice are nocturnal  
66 and as expected they rested more and were less active from Zeitgeber time (ZT) 0 to ZT 12 (lights-  
67 on) and were more active from ZT 12 to ZT 0 (lights-off); this activity pattern continued in constant  
68 darkness (Figure 1)<sup>12,13</sup>. The heart rate was highest at ~ZT 13 and it varied by  $76 \pm 4$  beats/min (as  
69 determined by the least-squares best fit sine wave) over the course of 24 h (Figure 1; Table S1 in  
70 the Supplementary Information).

### 71 **Circadian rhythm in intrinsic sinus node pacemaking and ion channel expression**

72 Experiments on the isolated, denervated, Langendorff-perfused heart (Figure 2A) dissected at  
73 projected ZT 0 or ZT 12 demonstrated that there was a circadian rhythm in *intrinsic* sinus node  
74 pacemaking: the intrinsic heart rate was still higher at ZT 12 than ZT 0 – by 107 beats/min (Table  
75 S1). In the Langendorff-perfused heart, a suitable pacing protocol (Figure S1 in the Supplementary  
76 Information) showed the corrected sinus node recovery time (cSNRT), a commonly used indicator  
77 of sinus node function, to be significantly different at ZT 0 and ZT 12 (Figure 2B). It is concluded

78 that there is a circadian rhythm in the intrinsic heart rate. What is responsible for the intrinsic  
79 circadian rhythm? Molecular circadian clock machinery is ultimately responsible for all circadian  
80 rhythms. The master clock is in the suprachiasmatic nucleus of the brain, but there are peripheral  
81 clocks in other organs<sup>14</sup>. To determine if there is circadian clock machinery in the sinus node,  
82 qPCR was used – qPCR showed that mRNA for a wide range of molecules known to be involved  
83 in the circadian clock is present in the sinus node and the expression varied in the expected  
84 manner from ZT 0 to ZT 12 (Figure 2C). Two key transcripts, *Bmal1* and *Clock*, were measured in  
85 the sinus node at four time points (BMAL1 and CLOCK form a heterodimer); Figure 2D,E shows  
86 that they varied in a circadian manner and were at a maximum at ~ZT 0 (Table S1). The presence  
87 of an intrinsic circadian clock in the sinus node was confirmed by measuring the bioluminescence  
88 in the isolated sinus node from a transgenic mouse (*Per1::LUC*) carrying a luciferase reporter gene  
89 reporting the activity of *Per1*, a key circadian clock component (Figure 2F). *Per1*-driven  
90 bioluminescence fluctuated in the expected circadian manner and this periodicity was lost in *Cry1*<sup>-/-</sup>  
91 *Cry2*<sup>-/-</sup> mice lacking the *Cryptochrome* genes and consequently lacking a functional clock<sup>15</sup> (Figure  
92 2F). Pacemaking is the result of the concerted action of ion channels and Ca<sup>2+</sup>-handling proteins  
93 and it is likely that the local circadian clock in the sinus node controls the heart rate by controlling  
94 their expression. Expression of mRNA for many of these molecules (and also some key regulatory  
95 transcription factors) was measured by qPCR and some transcripts, for example the pacemaking  
96 ion channel *Hcn4*, demonstrated significant daily rhythms (Figure 2G; Table S2).

### 97 **Circadian rhythm in HCN4 and *I<sub>f</sub>***

98 Of the potential mechanisms controlling the intrinsic heart rate, we principally focused on *Hcn4*,  
99 because this is known to play a central role in pacemaking in the sinus node<sup>16</sup>. *Hcn4* mRNA was  
100 measured at six time points and was at a maximum at ~ZT 0 (Figure 3A; Table S1). Expression of  
101 HCN4 protein in the sinus node was measured using western blot at ZT 0 and ZT 12 – the western  
102 blot is shown in Figure 3B and the mean HCN4 band intensities are shown in Figure 3C. HCN4  
103 protein expression was higher at ZT 12 than ZT 0 (Figure 3C). Expression of HCN4 protein in the  
104 sinus node was also measured using immunohistochemistry (Figure 3D,E). Figure 3D shows  
105 examples of immunolabelling of HCN4 in tissue sections through the sinus node from mice culled  
106 at ZT 0 and ZT 12); consistent with the western blot, the labelling was brighter, indicating higher

107 expression, at ZT 12. This is confirmed by the mean data in Figure 3E. In summary, the data show  
108 a daily rhythm in HCN4 protein, but it is out of phase with the circadian rhythm in mRNA. Western  
109 blot and immunohistochemistry were used to measure HCN4 at four time points and this showed  
110 that HCN4 protein peaked at between ZT 6 and 12 (Figure S2; Table S1) – HCN4 protein,  
111 therefore, lags behind mRNA - this is expected. If there are changes in HCN4 protein, there should  
112 be changes in the corresponding ionic current,  $I_f$ . Figure 4A shows patch clamp recordings of  $I_f$   
113 from isolated sinus node cells – the cells were isolated at ZT 0 and ZT 10 and the recordings were  
114 made at ZT 2 and ZT 12 (the earliest time points at which recordings could be made). The current  
115 density was approximately double at ZT12 than at ZT2 and this is confirmed by the mean current-  
116 voltage relationships for  $I_f$  at the two time points in Figure 4B. Once cells were isolated at ZT 0 and  
117 ZT 10, recordings from different cells could continue to be made for ~3 h. In the case of cells  
118 isolated at ZT 0 we observed the current density to increase the later the recording, but in the case  
119 of cells isolated at ZT 10 we observed the current density to decrease the later the recording. In  
120 Figure 4C we have plotted the density of  $I_f$  in a total of 367 sinus node cells against the time of the  
121 recording (this includes cells which were isolated at ZT 3, 6, 9, 12 and 15). Figure 4C shows a  
122 projected daily rhythm in the density of  $I_f$  – clearly the circadian clock does not stop ticking on  
123 isolation of single sinus node cells.  $I_f$  density reached a maximum at ~ZT 10, approximately at the  
124 same time as the peak in HCN4 protein as assessed by western blot and immunohistochemistry  
125 (Figure S2; Table S1). Current density determines the rate of change of membrane potential and  
126 is, therefore, the physiologically important variable. It is calculated by dividing the current amplitude  
127 by the cell capacitance,  $C_m$ , and these variables are shown in Figure 4D,E. As anticipated there is  
128 a projected daily rhythm in  $I_f$  amplitude, which peaks at the same time as  $I_f$  density, but the  
129 fractional change in amplitude is less than the fractional change of density (Figure 4D,E). This is  
130 because there is a circadian rhythm in  $C_m$  (Figure 4E); in other words, a circadian rhythm in  $C_m$   
131 contributes to the circadian rhythm in  $I_f$  density.  $C_m$  is determined by cell size and other  
132 experiments confirmed that there is a circadian rhythm in cell size (Figure S3). A circadian rhythm  
133 in cell size may be surprising. However, a circadian rhythm in cell size has been reported in other  
134 tissues: in mouse liver, cell size at ZT 12 is less than at ZT 2<sup>17</sup>; axonal volume shows a circadian  
135 rhythm in s-LNV clock neurons in *Drosophila*<sup>18</sup>; glial cells and neurons in the housefly's visual

136 system show rhythmic size changes<sup>19</sup>.

### 137 **Role of $I_f$ and other ionic mechanisms in circadian rhythm in intrinsic heart rate**

138 To test whether the changes in  $I_f$  density could account for the daily rhythm in the intrinsic heart  
139 rate, the observed changes in  $I_f$  density (Figure 4C) were incorporated into a biophysical model of  
140 the spontaneous action potential of the mouse sinus node (Figure 4F). The model predicted a  
141 circadian rhythm in heart rate of  $101 \pm 11$  beats/min with a maximum heart rate at  $\sim$ ZT 10 (Figure  
142 4G; Table S1), roughly consistent with experimental data for the intrinsic heart rate (Figure 2A).  
143 This suggests that HCN4 and  $I_f$  participate in the circadian rhythm in the intrinsic heart rate. This  
144 was confirmed in the isolated, denervated sinus node dissected at four different time points. Block  
145 of  $I_f$  by 2 mM  $\text{Cs}^+$  (selective blocker of  $I_f^{20}$ ) decreased the heart rate as expected (Fig. 5A, top), but  
146 the effect of  $\text{Cs}^+$  on heart rate was greater at ZT 12 than ZT 0 (Figure 5A, bottom). Furthermore, in  
147 the presence of  $\text{Cs}^+$ , the circadian rhythm in the intrinsic heart rate was abolished (Figure 5A, top).  
148 Analogous results were obtained *in vivo*. In the conscious mouse, the heart rate at ZT 0 and ZT 12  
149 was measured using an ECGenie (a platform with embedded ECG electrodes). An intraperitoneal  
150 injection of 6 mg/kg ivabradine (selective blocker of  $I_f^{21}$ ) was given to block  $I_f$ . Once again, block of  
151  $I_f$  decreased the heart rate as expected (Figure 5C) and the effect of ivabradine on heart rate was  
152 greater at ZT 12 than ZT 0 (Figure 5D). Furthermore, in the presence of ivabradine, the circadian  
153 rhythm in the heart rate *in vivo* was abolished (Figure 5C). It is concluded that HCN4 and  $I_f$   
154 participate in the circadian rhythm in the intrinsic heart rate as well as the heart rate *in vivo*.

155 The so-called membrane and  $\text{Ca}^{2+}$  clocks are known to be responsible for pacemaking in  
156 the sinus node<sup>22</sup>. The membrane clock comprises ionic currents carried by a variety of ion  
157 channels. Although  $I_f$  carried by HCN channels is considered to be the most important, other ion  
158 channels also play a significant role. Various  $\text{K}^+$  channels showed a circadian rhythm (Figure 2G)  
159 and their potential role is considered in the Discussion. The  $\text{Ca}^{2+}$  clock involves spontaneous  $\text{Ca}^{2+}$   
160 releases ( $\text{Ca}^{2+}$  sparks) from the sarcoplasmic reticulum during diastole. This drives  $\text{Ca}^{2+}$  extrusion  
161 via the electrogenic  $\text{Na}^+$ - $\text{Ca}^{2+}$  exchanger (*Slc8a1*; NCX1). The resulting inward current generated  
162 by NCX1 helps drive pacemaking. Although a circadian rhythm was not detected in any of the  
163 principal components of the  $\text{Ca}^{2+}$  clock (apart from  $\text{Ca}^{2+}$ /calmodulin-dependent protein kinase II $\delta$  –  
164 *Camk2d*), the potential role of the  $\text{Ca}^{2+}$  clock in the circadian rhythm in the intrinsic heart rate was

165 investigated by recording  $\text{Ca}^{2+}$  sparks from isolated sinus node cells and measuring the effect of  
166 incapacitating the  $\text{Ca}^{2+}$  clock by 2  $\mu\text{M}$  ryanodine on the intrinsic heart rate measured in the isolated  
167 sinus node (Figures S4-S6). Measurement of  $\text{Ca}^{2+}$  sparks showed that at ZT 12 as compared to  
168 ZT 0 there was an increase in spark duration and a non-significant increase in spark amplitude and  
169 consequently there was an increase in spark mass (calculated as amplitude $\times$ 1.206 $\times$ spark full width  
170 at half maximum amplitude<sup>3</sup>)<sup>23</sup> ( $P=0.056$ ), although there was a decrease in spark frequency and  
171 diastolic  $\text{Ca}^{2+}$  (Figure S5). The increase in spark mass at ZT 12 could increase the impact of the  
172  $\text{Ca}^{2+}$  clock on pacemaking (although the effect could be mitigated by the reduction of  $\text{Ca}^{2+}$  spark  
173 frequency). In the isolated sinus node, the effect on the intrinsic heart rate of incapacitating the  
174  $\text{Ca}^{2+}$  clock by ryanodine was greater at ZT 12 than ZT 0 (Figure S6A). In the presence of  
175 ryanodine, the circadian rhythm in the intrinsic heart rate was abolished (Figure S6A, top) and it is  
176 concluded that the  $\text{Ca}^{2+}$  clock also participates in the circadian rhythm in the intrinsic heart rate.

#### 177 **Link between local circadian clock in sinus node and membrane and $\text{Ca}^{2+}$ clocks**

178 To investigate a possible link between the local circadian clock in the sinus node and the circadian  
179 rhythm in the intrinsic heart rate, experiments were conducted on a transgenic mouse in which the  
180 *Bmal1* gene had been knocked out in the heart only (driven by the  $\alpha$  myosin heavy chain  
181 promoter)<sup>24</sup>. Knockout of *Bmal1* is known to incapacitate the circadian clock<sup>25</sup>. Figure 6A confirms  
182 that *Bmal1* mRNA was effectively knocked out in the sinus node at both ZT 0 and ZT 12 and  
183 Figure 6B shows that this disrupted the circadian rhythm in the expression of *Clock* mRNA –  
184 evidence that the circadian clock in the sinus node had been disrupted as expected. In the cardiac-  
185 specific *Bmal1* knockout mouse, from ZT 0 to ZT 12, there was no longer a significant variation in  
186 expression of *Hcn4* mRNA (Figure 6C) and HCN4 protein (Figure 3D,E). Consistent with this, the  
187 variation in  $I_f$  density from ZT 0 to ZT 12 was blunted (Figure 6D,E); this is best shown by Figure  
188 6F, which compares the variation in  $I_f$  density from ZT 0 to ZT 12 in wild-type and cardiac-specific  
189 *Bmal1* knockout mice. Finally, Figure 5B (top) shows the intrinsic heart rate as measured in the  
190 isolated sinus node: whereas there was a circadian rhythm in the wild-type mice with the intrinsic  
191 heart rate peaking at  $\sim$ ZT 12 (Figure 5A, top), in cardiac-specific *Bmal1* knockout mice this normal  
192 pattern was lost (Figure 5B, top). Furthermore, whereas there was a circadian rhythm in the  
193 reduction of the intrinsic heart rate on block of  $I_f$  by  $\text{Cs}^+$  in wild-type mice (with the effect peaking at

194 ~ZT 12; Figure 5A, bottom), in cardiac-specific *Bmal1* knockout mice, once again, this pattern was  
195 lost (Figure 5B, bottom). In contrast, cardiac-specific *Bmal1* knockout had little effect on the  
196 circadian rhythm in the  $Ca^{2+}$  clock-control of the intrinsic heart rate (Figure S6B). It is concluded  
197 that the local circadian clock in the sinus node is controlling HCN4 and  $I_f$  (but perhaps not the  $Ca^{2+}$   
198 clock) and thereby the intrinsic heart rate.

#### 199 **Evidence that clock protein, BMAL1, controls *Hcn4* transcription**

200 The CLOCK:BMAL1 heterodimer acts as a transcriptional activator or enhancer by binding to E-  
201 box binding sites in the promoter, intron or exon of a gene<sup>26,27</sup>. Using RVISTA  
202 (<https://rvista.dcode.org>) we found eight canonical E-box binding sites in the *Hcn4* gene and 20 kb  
203 of its 5' flanking region (Figure 6H). *In vitro* ChIP was used to test whether BMAL1 specifically  
204 binds to these sites: 3T3-L1 cells were UV cross-linked following transfection with His-tagged  
205 *Bmal1*. His-tagged BMAL1 bound to its DNA targets was then immunoprecipitated using antibodies  
206 directed against the His-tag. DNA pulled down by ChIP was analysed by qPCR using primers  
207 mapping to the various E-box binding sites (Figure 6G). Figure 6G shows E-box binding sites D  
208 and G (within introns of the *Hcn4* gene; Figure 6H) were significantly more abundant than  
209 background signal (red dashed line).

#### 210 **Role for the autonomic nervous system in circadian rhythm in heart rate *in vivo*?**

211 This study highlights the role of intrinsic factors in the circadian rhythm in intrinsic heart rate.  
212 Nevertheless, a role for the autonomic nervous system must be considered. In this study, *in vivo*,  
213 the heart rate was high during the awake period when the mice were physically active (Figure 1). If  
214 the level of physical activity is high, it would be expected to influence the heart rate via the  
215 autonomic nervous system (via an increase in sympathetic activity and possibly a decrease in  
216 vagal activity). However, in caged-housed mice with no access to a running wheel, activity levels  
217 will be low. A light pulse when mice are active is known to cause the mice to freeze and be  
218 inactive<sup>12</sup>. Figure 7A shows that a 1 h light pulse from ZT13 to ZT14 caused the physical activity of  
219 the mice to fall to baseline values, whereas the heart rate remained relatively high. In contrast, a 1  
220 h light pulse from ZT1 to ZT2 was again associated with a baseline level of physical activity, but  
221 the heart rate was relatively low. Therefore, in this experiment, the heart rate was primarily  
222 influenced by the time of day rather than the activity level. Figure S7 shows that there is no



223 discernible relationship between heart rate and physical level over 24 h (Figure 7A) and before,  
224 during and after the light pulses (Figure 7B). *In vivo*, the heart rate in the absence of physical  
225 activity can be obtained by recording the ECG from the anaesthetised mouse (although  
226 anaesthetic is known to depress the intrinsic pacemaker activity of the sinus node<sup>28</sup> as well as  
227 cardiac vagal and sympathetic tone<sup>29</sup>). The heart rate in the anaesthetised mouse also varied in a  
228 daily manner – the heart rate was highest at ~ZT 12 and it varied by  $51 \pm 15$  beats/min over 24 h  
229 (Figure 7B; Table S1). It is concluded that in this study the effect of activity on the heart rate of the  
230 mice was slight and not discernible. Next, the effect of vagotomy was investigated. There are right  
231 and left vagal nerves and sectioning of both is lethal. However, vagal nerves to the sinus node are  
232 primarily, but not exclusively, from the right vagus<sup>30</sup>. The right vagus was sectioned in a group of  
233 rats (rat was studied, because we have experience of vagotomy in the rat<sup>31</sup>). Figure 7C shows that  
234 following the vagotomy the circadian rhythm in heart rate persisted.

235 We further tested the involvement of the autonomic nervous system by blocking cardiac  
236 muscarinic and  $\beta$  receptors by atropine and propranolol. Experiments were conducted on  
237 anaesthetised mice, and intraperitoneal injections of 1 mg/kg atropine and 1 mg/kg propranolol  
238 were given, similar doses to those used by others<sup>32-34</sup> and by us in an earlier study of exercise  
239 training-induced bradycardia in the mouse<sup>35</sup>. After autonomic blockade, the circadian rhythm in  
240 heart rate persisted, although it was reduced in amplitude (Figure 7D). In our earlier study, similar  
241 concentrations of atropine and propranolol also failed to abolish the exercise training-induced  
242 bradycardia<sup>35</sup>; we concluded that the autonomic nervous system is not responsible for the exercise  
243 training-induced bradycardia<sup>35</sup> and based on Figure 7D we could conclude that it is also not solely  
244 responsible for the circadian rhythm in heart rate *in vivo*. However, following the publication of our  
245 study of exercise training-induced bradycardia, Aschar-Sobbi *et al.*<sup>36</sup> used intraperitoneal injections  
246 of higher concentrations of atropine and propranolol (2 mg/kg atropine and 10 mg/kg propranolol)  
247 and stated that the exercise training-induced bradycardia in the mouse is abolished on autonomic  
248 blockade. Therefore, we repeated the experiment in Figure 7D, but we used intraperitoneal  
249 injections of 2 mg/kg atropine and 10 mg/kg propranolol as did Aschar-Sobbi *et al.*<sup>36</sup>. This time,  
250 after autonomic blockade, the circadian rhythm in heart rate was lost (Figure 7E). Although this  
251 suggests that the autonomic nervous system is involved in the circadian rhythm in heart rate *in*

252 *vivo*, the effect of the higher concentrations of atropine and propranolol must be taken into  
253 consideration. Propranolol blocks  $\beta$ -receptors with an  $IC_{50}$  of 12 nM  
254 (<http://www.selleckchem.com/products/propranolol-hcl.html>). However, work on heterologously  
255 expressed ion channels in cell lines has shown that propranolol blocks the cardiac  $Na^+$  channel,  
256  $Na_v1.5$  (*Scn5a*) with an  $IC_{50}$  of 2.7  $\mu M$ <sup>37</sup> and HCN4 with an  $IC_{50}$  of 50.5  $\mu M$ <sup>38</sup>. It was confirmed that  
257 propranolol also blocks  $I_f$  in native heart cells: in mouse sinus node cells, 68.4  $\mu M$  propranolol  
258 blocked  $I_f$  by 54% (Figure 7F); typical current traces and current-voltage relationships are shown in  
259 Figure S8. Assuming that only 10% of propranolol is free<sup>39</sup>, an injection of 10 mg/kg propranolol is  
260 estimated to give a propranolol concentration of 6  $\mu M$  if it partitions in all body water (~60% of body  
261 mass in the mouse<sup>40</sup>) and 66  $\mu M$  if it only partitions into the blood (58.5 ml/kg in the mouse;  
262 <https://www.nc3rs.org.uk/mouse-decision-tree-blood-sampling>). Therefore, based on these  
263 estimates, it is possible that 10 mg/kg propranolol may block, to some extent,  $Na_v1.5$  and HCN4,  
264 both of which vary in a circadian manner (Figure 2G). If propranolol did block HCN4 to a significant  
265 extent, it is not surprising that propranolol abolished the circadian rhythm in heart rate (Figure 7E),  
266 because ivabradine also did (Figure 5C). Propranolol at a dose of 1 mg/kg as used for Figure 7D is  
267 expected to cause less block of  $Na_v1.5$  and little or no block of HCN4 and yet complete block of  $\beta$ -  
268 receptors (the expected plasma concentration is still many times greater than the  $IC_{50}$  for block of  
269  $\beta$ -receptors). As an aside, calculation shows that atropine at a dose of 1 or 2 mg/kg is sufficient for  
270 complete block of M2 muscarinic receptors. Based on Figure 7D, the autonomic nervous system  
271 cannot be solely responsible for the circadian rhythm in heart rate *in vivo*.

272

273

## DISCUSSION

274 For the first time, we show here that: (i) there is a circadian or daily rhythm in the *intrinsic* heart  
275 rate set by the pacemaker of the heart, the sinus node, (ii) there is a functioning circadian clock in  
276 the sinus node, (iii) there is a circadian rhythm in the expression of a variety of cardiac ion  
277 channels, including *Hcn4* and its corresponding ionic current,  $I_f$ , in the sinus node, (iv) *Hcn4*  
278 transcription is directly controlled by the clock transcription factor, BMAL1, (v) the circadian rhythm  
279 in *Hcn4* plays an important role in the circadian rhythm in the *intrinsic* heart rate.

## 280 **Local circadian clock in heart**

281 Previously, it has been demonstrated that there a functioning circadian clock in the heart<sup>e.g.41</sup>. This  
282 is the first report of a functioning circadian clock in the sinus node: qPCR showed the presence of  
283 transcripts for many key circadian clock components and many showed the expected circadian  
284 rhythm and expected phase relationship; for example, *Bmal1* was downregulated, but *Cry2*, *Per1*  
285 and *Per2* were upregulated at ZT 12 compared to ZT 0 (Figure 2C). We also showed a circadian  
286 rhythm in *Per1* using a bioluminescent reporter gene (Figure 2F).

## 287 **Circadian rhythm in cardiac ion channel expression is common**

288 Here we show a circadian rhythm in *Hcn4*, Na<sub>v</sub>1.5 (*Scn5a*), K<sub>v</sub>1.4 (*Kcna4*), K<sub>v</sub>4.2 (*Kcnd2*), K<sub>v</sub>1.5  
289 (*Kcna5*), ERG (K<sub>v</sub>11.1; *Kcnh2*), K<sub>ir</sub>6.1 (*Kcnj8*), K<sub>ir</sub>6.2 (*Kcnj11*), SUR1 (*Abcc8*), SUR2 (*Abcc9*),  
290 TASK-1 (K2p3.1; *Kcnk3*) and Cl<sup>-</sup> voltage-gated channel 2 (*Clcn2*) in the sinus node (Figure 2G).  
291 Further experiments have shown that *Hcn1* also shows a circadian rhythm in the sinus node  
292 (Yanwen Wang, unpublished data). Curiously, *Hcn2* has been reported to show a circadian rhythm  
293 in liver<sup>42</sup>. A circadian rhythm in cardiac ion channel expression is not only seen in the sinus node –  
294 it is likely to be occurring throughout the heart. In atrial muscle, a circadian rhythm has been  
295 reported in K<sub>v</sub>4.2 (*Kcnd2*)<sup>41,43,44</sup>, KChIP2 (*Kcnip2*)<sup>41,44</sup>, K<sub>v</sub>1.5 (*Kcna5*)<sup>41,43</sup>, TASK-1 (K2p3.1;  
296 *Kcnk3*)<sup>41</sup>, Cx40 (*Gja5*)<sup>45</sup> and Cx43 (*Gja1*)<sup>45</sup>. In ventricular muscle, a circadian rhythm has been  
297 reported in Na<sub>v</sub>1.5 (*Scn5a*)<sup>46</sup>, Ca<sub>v</sub>1.2 (*Cacna1c*)<sup>47</sup>, K<sub>v</sub>4.2 (*Kcnd2*)<sup>41,43,48</sup>, KChIP2 (*Kcnip2*)<sup>41,44</sup>, K<sub>v</sub>1.5  
298 (*Kcna5*)<sup>41,43</sup>, ERG (K<sub>v</sub>11.1; *Kcnh2*)<sup>48</sup>, TASK-1 (K2p3.1; *Kcnk3*)<sup>41</sup>, Cx40 (*Gja5*)<sup>45</sup> and Cx43 (*Gja1*)<sup>45</sup>.  
299 Some circadian varying ion channels are common to the sinus node and the atrial or ventricular  
300 muscle: Na<sub>v</sub>1.5 (*Scn5a*), K<sub>v</sub>4.2 (*Kcnd2*), K<sub>v</sub>1.5 (*Kcna5*), ERG (K<sub>v</sub>11.1; *Kcnh2*) and TASK-1 (K2p3.1;  
301 *Kcnk3*). Of these, all were significantly more highly expressed at ZT 12 than ZT 0 in the sinus node  
302 (Figure 2G); in atrial and ventricular muscle, there was a qualitatively similar circadian rhythm in  
303 Na<sub>v</sub>1.5 (*Scn5a*)<sup>46</sup>, K<sub>v</sub>4.2 (*Kcnd2*)<sup>41,43,48</sup>, K<sub>v</sub>1.5 (*Kcna5*; in ventricular muscle, but not atrial  
304 muscle)<sup>41,43</sup> and ERG (K<sub>v</sub>11.1; *Kcnh2*)<sup>48</sup>. However, the opposite circadian rhythm in TASK-1  
305 (K2p3.1; *Kcnk3*) has been reported in atrial and ventricular muscle<sup>41</sup>.

306 This study has demonstrated that *Hcn4* is likely to be under the control of BMAL1  
307 generated by the local clock (Figure 6). In the ventricle, it has been reported that: Nav1.5 (*Scn5a*)  
308 and ERG (K<sub>v</sub>11.1; *Kcnh2*) are under the control of CLOCK:BMAL1 generated by the local

309 clock<sup>46,48</sup>; and K<sub>v</sub>4.2 (*Kcnd2*), K<sub>v</sub>1.5 (*Kcna5*), TASK-1 (K2p3.1; *Kcnk3*), Cx40 (*Gja5*) and Cx43  
310 (*Gja1*) are under the control of the suprachiasmatic nucleus (not the local clock) via the autonomic  
311 nervous system<sup>41</sup>. Confusingly, KChIP2 (*Kcnip2*) has been reported to be under the control of a  
312 BMAL1-dependent (i.e. local clock-dependent) oscillator, krüppel-like factor 15 (*Klf15*)<sup>44</sup>, and yet  
313 under the control of the suprachiasmatic nucleus (not the local clock) via the autonomic nervous  
314 system<sup>41</sup>.

### 315 **Circadian rhythm in intrinsic heart rate**

316 Cardiac-specific knockout of *Bmal1* abolished the normal circadian rhythm in the intrinsic heart rate  
317 (Figure 5A,B), proving that it is under the control of the local circadian clock (however, it is  
318 interesting that some type of rhythm, albeit abnormal, remained after cardiac-specific knockout of  
319 *Bmal1* – Fig. 5B). We measured a circadian rhythm in HCN4 protein and *I<sub>f</sub>* (Figures 3B-E, 4 and  
320 S2) roughly in phase with the circadian rhythm in the intrinsic heart rate (in contrast *Hcn4* mRNA  
321 was out of phase – Figure 3A; Table S1). It is likely that the circadian rhythm in *I<sub>f</sub>* plays an  
322 important role in the intrinsic heart rate: computer modelling suggested that the changes in *I<sub>f</sub>* are  
323 sufficient to explain the changes in intrinsic heart rate (Figure 4G); block of HCN4 and *I<sub>f</sub>* by Cs<sup>+</sup>  
324 abolished the circadian rhythm in the intrinsic heart rate (Figure 5A); and cardiac-specific knockout  
325 of *Bmal1* abolished the normal circadian rhythm in *Hcn4* mRNA and protein, *I<sub>f</sub>* and the effect of  
326 Cs<sup>+</sup>, as well the intrinsic heart rate (Figures 3E, 5B and 6C,E,F). However, it is likely that *I<sub>f</sub>* is not  
327 the only mechanism involved: there was a circadian rhythm in CaMKII $\delta$  (*Camk2d*) and Ca<sup>2+</sup> sparks  
328 (Figures 2G and S5), and incapacitating the Ca<sup>2+</sup> clock with ryanodine eliminated the circadian  
329 rhythm in the intrinsic heart rate (Figure S6A). In addition, it is possible that the circadian rhythm  
330 detected in various K<sup>+</sup> channels, particularly ERG (K<sub>v</sub>11.1; *Kcnh2*) (Figure 2G), also plays a role; in  
331 the sinus node, ERG (K<sub>v</sub>11.1; *Kcnh2*), responsible for the rapid delayed rectifier K<sup>+</sup> current, *I<sub>K,r</sub>*,  
332 sets the maximum diastolic potential and blocking *I<sub>K,r</sub>* abolishes pacemaking<sup>49</sup>.

### 333 **Circadian rhythm in heart rate *in vivo* – is it multifactorial?**

334 This study has demonstrated a circadian rhythm in the *intrinsic* heart rate. Implications of this for  
335 the circadian rhythm in heart rate *in vivo* can be speculated on. Previously, the circadian rhythm in  
336 heart rate *in vivo* has been attributed to the autonomic nervous system and in particular to high  
337 vagal tone during the sleep period<sup>4</sup>. This primarily has been based on heart rate variability as a

338 surrogate measure of autonomic tone<sup>5</sup>; however, as discussed above, this cannot be used in any  
339 simple way as a measure of autonomic tone<sup>8</sup>. We report that autonomic blockade utilising high  
340 concentrations of atropine and propranolol abolished the circadian rhythm in heart rate *in vivo*  
341 (Figure 7E). Abolition of the circadian rhythm in heart rate *in vivo* on autonomic blockade has also  
342 been reported by Tong *et al.*<sup>41</sup> However, Oosting *et al.*<sup>50</sup> have reported that autonomic blockade  
343 does not abolish the circadian rhythm in heart rate. Furthermore, caution must be used in  
344 interpreting the effect of autonomic blockade involving atropine and propranolol, because  
345 propranolol is non-specific and also blocks Na<sub>v</sub>1.5 (*Scn5a*) and I<sub>Na</sub> and HCN4 and I<sub>f</sub> (Figures 7F  
346 and S8)<sup>37,38</sup>. Because I<sub>f</sub> at least is greater during the awake period, propranolol will be expected to  
347 have a greater depressing effect on heart rate during the awake period. This is an alternative  
348 explanation of why the circadian rhythm in heart rate *in vivo* was abolished by autonomic blockade  
349 in this study when utilising high concentrations of atropine and propranolol (Figure 7E).  
350 Nevertheless, if it is assumed that the autonomic nervous system is involved, the right vagus nerve  
351 (primarily, but not exclusively, responsible for the innervation of the sinus node<sup>30</sup>) cannot be solely  
352 responsible, because sectioning the right vagus did not impact the circadian rhythm in heart rate *in*  
353 *vivo* in the rat (Figure 7C). This suggests that a circadian rhythm in sympathetic nerve activity or  
354 plasma catecholamine levels is more important (if it is assumed that the autonomic nervous  
355 system is involved). However, it has been reported that transgenic knockout of the M2 receptor or  
356 β1, β2 and β3 adrenoceptors has no effect on the circadian rhythm in heart rate *in vivo*<sup>51</sup>. In  
357 addition, cardiac transplant patients with autonomic denervation have a preserved nocturnal  
358 bradycardia 7-36 months after transplantation<sup>52,53</sup>. This work does not support a role for the  
359 autonomic nervous system in the circadian rhythm in heart rate *in vivo*.

360 This study has shown that there is a circadian rhythm in the intrinsic heart rate of the  
361 appropriate amplitude (72-107 beats/min) and phase (peaking at ~ZT 12; Figures 2A and 5A;  
362 Table S1) to be able to explain the circadian rhythm in heart rate *in vivo* (Figure 1). Furthermore,  
363 block of HCN4 and I<sub>f</sub> by ivabradine had a bigger effect on heart rate during the awake period and  
364 abolished the circadian rhythm in heart rate *in vivo* in the mouse (Figure 5C). Data consistent with  
365 this have been obtained by Ptaszynski *et al.*<sup>54</sup> and Grigoryan *et al.*<sup>55</sup> who studied the effect of  
366 ivabradine on the heart rate of patients either with inappropriate sinus node tachycardia or

367 ischaemic heart disease and heart failure; whereas ivabradine caused a large decrease in heart  
368 rate during the day, it caused little decrease at night. In other words, the effect of ivabradine on  
369 heart rate showed a circadian rhythm and was greater when the subjects were awake. This is  
370 consistent with the work on the mice (Figure 5C,D)<sup>54</sup>. However, it is known that cardiac-specific  
371 knockout of *Bmal1*<sup>46</sup> or cardiac-specific expression of a dominant negative *Clock* mutant<sup>56</sup> does not  
372 abolish the circadian rhythm in heart rate *in vivo* (although it does reduce it). Furthermore, we  
373 show here that cardiac-specific knockout of *Bmal1* abolishes the *normal* circadian rhythm in *Hcn4*  
374 (mRNA and protein),  $I_f$  and intrinsic heart rate (Figures 3E, 5 and 6C,E,F). Therefore, HCN4 and  $I_f$   
375 cannot be the only mechanism controlling the circadian rhythm in heart rate *in vivo* – perhaps the  
376 reduction of the circadian rhythm in heart rate *in vivo*<sup>46</sup> on cardiac-specific knockout of *Bmal1*  
377 represents the contribution of the circadian rhythm in the intrinsic heart rate to the circadian rhythm  
378 in heart rate *in vivo*. What is responsible for the circadian rhythm in heart rate *in vivo* that remains  
379 after cardiac-specific *Bmal1* knockout? This could be due to the autonomic nervous system.  
380 Consistent with this, Figure 7D shows that the circadian rhythm in heart rate *in vivo* was reduced in  
381 amplitude after autonomic blockade (achieved with the lower doses of atropine and propranolol).  
382 However, the contribution may not be in the way originally conceived (acute control of heart rate  
383 via changes in ionic conductance): Tong *et al.*<sup>41,45</sup> have shown that the circadian rhythm of  $K_v4.2$   
384 (*Kcnd2*), KChIP2 (*Kcnp2*),  $K_v1.5$  (*Kcna5*), TASK-1 (K2p3.1; *Kcnk3*), Cx40 (*Gja5*) and Cx43 (*Gja1*)  
385 in the atria and ventricles is lost after autonomic blockade suggesting transcriptional regulation  
386 mediated by the autonomic nervous system. It is interesting that  $\beta$ -agonists affect both *Bmal1* and  
387 *Per2* in heart<sup>57,58</sup>.

## 388 **Summary**

389 In summary, this study has shown that there is a circadian rhythm in the *intrinsic* heart rate and this  
390 is likely to contribute to the circadian rhythm in heart rate *in vivo*. Our findings provide new  
391 mechanistic insight into the fundamental question of why the heart rate of a mammal is lower when  
392 asleep and also explains the nocturnal occurrence of bradyarrhythmias<sup>1,3,59-63</sup>.

## 393 **METHODS**

394 Extended methods are given in the Supplementary Information.

## 395 **Animals**

396 The telemetry study was approved by the Norwegian Council for Animal Research, in accordance  
397 with the Guide for the Care and Use of Laboratory Animals from the European Commission  
398 Directive 86/609/EEC. Ethical approval for vagotomy in rats was from University College London,  
399 in accordance with the UK Animals (Scientific Procedures) Act 1986. All remaining procedures  
400 were approved by the University of Manchester and were in accordance with the UK Animals  
401 (Scientific Procedures) Act 1986. Experiments were conducted on adult male mice: C57BL/6J mice  
402 obtained from Harlan Laboratories; *Per1::LUC* mice (in which luciferase expression is driven by the  
403 mouse *Per1* promoter and 5'-UTR elements<sup>64</sup>) on a *Cry1<sup>+/+</sup>Cry2<sup>+/+</sup>* or *Cry1<sup>-/-</sup>Cry2<sup>-/-</sup>* background; and  
404 cardiac-specific *Bmal1* knockout mice.

#### 405 **Electrophysiology**

406 ECGs or ECG-like electrograms were recorded for measurement of heart rate: from conscious  
407 unrestrained mice using either subcutaneously implanted radio telemetry transmitters or an  
408 ECGenie; from isofluorane-anaesthetised mice using a conventional three-lead system; from  
409 isolated Langendorff-perfused hearts; and from isolated right atrial preparations encompassing the  
410 sinus node. In the Langendorff-perfused hearts, a suitable pacing protocol was also used to  
411 determine the corrected sinus node recovery time. Strips of sinus node tissue were dissociated  
412 into single cells by a standard enzymatic and mechanical procedure and  $I_f$  was investigated using  
413 the patch clamp technique in the whole-cell mode. A previously developed biophysically-detailed  
414 mathematical model of the mouse sinus node cell action potential<sup>65</sup> was used to assess the effect  
415 of changes in the density of  $I_f$  on the spontaneous action potential.

#### 416 **mRNA and protein expression**

417 RNA was isolated from frozen 1 mm sinus node punch biopsies and gene expression measured  
418 using quantitative PCR (qPCR) either using medium throughput custom-designed Taqman Low  
419 Density Array Cards or individual SYBR green assays. HCN4 protein was investigated using either  
420 sinus node homogenates and western blotting or tissue cryosections and immunohistochemistry.  
421 *Per1* expression was also measured using the *Per1::LUC* mouse: total bioluminescence was  
422 recorded for 96 h from freshly dissected intact sinus node preparations from *Per1::LUC* mice using  
423 a photomultiplier tube assembly.

#### 424 ***In vitro* chromatin immunoprecipitation (ChIP)**

425 ChIP was performed on 3T3-L1 cells using the SimpleChIP chromatin immunoprecipitation kit  
426 according to the manufacturer's instructions. Prior to cross-linking, 3T3-L1 cultures at a density of  
427  $10^4$  cells/cm<sup>2</sup> were transfected with plasmid containing His-tagged *Bmal1* for 48 h. Antibody  
428 directed against the His-tag was used for immunoprecipitation. DNA obtained from ChIP was  
429 analysed by qPCR using primers mapping to canonical E-box binding sites, i.e., consensus binding  
430 sites for the CLOCK::BMAL1 heterodimer. E-box binding sites on the HCN4 gene and in 20 kb of  
431 the 5' flanking region were obtained using the RVISTA function within ECR browser  
432 (<http://ecrbrowser.dcode.org/>). Quantification of *Hcn4* E-box binding sites was conducted by, first,  
433 normalisation to the housekeeping genes *Gapdh* and *L7* and, secondly, normalisation to data from  
434 3T3-L1 cells subjected to transfection treatment without plasmid

#### 435 **ACKNOWLEDGEMENTS**

436 We thank Ms Rayna Samuels for technical assistance.

#### 437 **AUTHOR CONTRIBUTIONS**

438 Mark R. Boyett, Alicia D'Souza and George Hart conceived the project. Mark R. Boyett, Alicia  
439 D'Souza, Hugh D. Piggins, Halina Dobrzynski and Elizabeth Cartwright obtained funding for the  
440 project. Anne Berit Johnsen, Alicia D'Souza, Ulrik Wisloff, Eleanor Gill, Charlotte Cox, Yanwen  
441 Wang and Nick Ashton were involved in biotelemetry recordings. Yanwen Wang carried out  
442 electrophysiological experiments with assistance from Dario DiFrancesco and Annalisa Bucchi in  
443 patch clamp recordings. Alicia D'Souza carried out transcriptional profiling, bioluminescence  
444 recording and autonomic block experiments with assistance from Cali Anderson, Sven Wegner  
445 and Sunil Logantha. Alicia D'Souza, Yu Zhang and Yanwen Wang carried out western blotting  
446 experiments. Yanwen Wang and Nicholas Black performed immunofluorescent labelling studies.  
447 Haibo Ni and Henggui Zhang performed computer modelling studies using experimental data  
448 collected by Yanwen Wang. Yanwen Wang was responsible for the generation, breeding and  
449 maintenance of transgenic animals and all experiments on these animals (with assistance from  
450 Cheryl Petit, Hugh D. Piggins and Alicia D'Souza). Serve Olieslagers, Alicia D'Souza and Paula da  
451 Costa Martins were responsible for chromatin immunoprecipitation experiments. Svetlana  
452 Mastitskaya performed vagotomy experiments. Mark R. Boyett and Alicia D'Souza produced the  
453 first version of the manuscript, although subsequently all authors contributed.



454

455

#### **SOURCES OF FUNDING**

456 This work was supported by the British Heart Foundation (RG/11/18/29257; PG/15/16/31330) and  
457 the CARIPLO Foundation (ACROSS 2014-0728).

458

459

#### **COMPETING INTERESTS**

460 None declared.

461

## REFERENCES

- 462 1 Northcote, R. J., Canning, G. P. & Ballantyne, D. Electrocardiographic findings in male  
463 veteran endurance athletes. *British Heart Journal* **61**, 155-160 (1989).
- 464 2 Durgan, D. J. & Young, M. E. The cardiomyocyte circadian clock: emerging roles in health  
465 and disease. *Circulation Research* **106**, 647-658 (2010).
- 466 3 Otsuka, K. *et al.* Experimental study on the relationship between cardiac arrhythmias and  
467 sleep states by ambulatory ECG-EEG monitoring. *Clin Cardiol* **9**, 305-313 (1986).
- 468 4 Vandewalle, G. *et al.* Robust circadian rhythm in heart rate and its variability: influence of  
469 exogenous melatonin and photoperiod. *Journal of Sleep Research* **16**, 148-155 (2007).
- 470 5 Sztajzel, J. Heart rate variability: a noninvasive electrocardiographic method to measure  
471 the autonomic nervous system. *Swiss Medical Weekly* **134**, 514-522 (2004).
- 472 6 Massin, M. M., Maeyns, K., Withofs, N., Ravet, F. & Gerard, P. Circadian rhythm of heart  
473 rate and heart rate variability. *Archives of disease in childhood* **83**, 179-182 (2000).
- 474 7 Nakagawa, M. *et al.* Circadian rhythm of the signal averaged electrocardiogram and its  
475 relation to heart rate variability in healthy subjects. *Heart* **79**, 493-496 (1998).
- 476 8 Monfredi, O. *et al.* Biophysical characterisation of the under-appreciated and important  
477 relationship between heart rate variability and heart rate. *Hypertension* **64**, 1334-1343  
478 (2014).
- 479 9 Degaute, J. P., van de Borne, P., Linkowski, P. & Van Cauter, E. Quantitative analysis of  
480 the 24-hour blood pressure and heart rate patterns in young men. *Hypertension* **18**, 199-  
481 210 (1991).
- 482 10 Dilaveris, P. E., Farbom, P., Batchvarov, V., Ghuran, A. & Malik, M. Circadian behavior of  
483 P-wave duration, P-wave area, and PR interval in healthy subjects. *Annals of Noninvasive  
484 Electrocardiology* **6**, 92-97 (2001).
- 485 11 Bonnemeier, H. *et al.* Circadian profile of QT interval and QT interval variability in 172  
486 healthy volunteers. *Pacing and Clinical Electrophysiology* **26**, 377-382 (2003).
- 487 12 LeGates, T. A. & Altimus, C. M. Measuring circadian and acute light responses in mice  
488 using wheel running activity. *Journal of Visualized Experiments* **48**, e2463 (2011).
- 489 13 Veasey, S. C. *et al.* An automated system for recording and analysis of sleep in mice.

- 490 *Sleep* **23**, 1025-1040 (2000).
- 491 14 Mohawk, J. A., Green, C. B. & Takahashi, J. S. Central and peripheral circadian clocks in  
492 mammals. *Annual Review of Neuroscience* **35**, 445-462 (2012).
- 493 15 van der Horst, G. T. *et al.* Mammalian Cry1 and Cry2 are essential for maintenance of  
494 circadian rhythms. *Nature* **398**, 627-630 (1999).
- 495 16 DiFrancesco, D. The role of the funny current in pacemaker activity. *Circulation Research*  
496 **106**, 434-446 (2010).
- 497 17 Sinturel, F. *et al.* Diurnal Oscillations in Liver Mass and Cell Size Accompany Ribosome  
498 Assembly Cycles. *Cell* **169**, 651-663 e614 (2017).
- 499 18 Petsakou, A., Sapsis, T. P. & Blau, J. Circadian Rhythms in Rho1 Activity Regulate  
500 Neuronal Plasticity and Network Hierarchy. *Cell* **162**, 823-835 (2015).
- 501 19 Herrero, A., Duhart, J. M. & Ceriani, M. F. Neuronal and glial clocks underlying structural  
502 remodeling of pacemaker neurons in drosophila. *Front Physiol* **8**, 918 (2017).
- 503 20 Nikmaram, M. R., Boyett, M. R., Kodama, I., Suzuki, R. & Honjo, H. Variation in the effects  
504 of Cs<sup>+</sup>, UL-FS 49 and ZD7288 within the sinoatrial node. *American Journal of Physiology*  
505 **272**, H2782-H2792 (1997).
- 506 21 DiFrancesco, D. Funny channels in the control of cardiac rhythm and mode of action of  
507 selective blockers. *Pharmacological Research* **53**, 399-406 (2006).
- 508 22 Monfredi, O. J., Dobrzynski, H., Mondal, T., Boyett, M. R. & Morris, G. L. The anatomy and  
509 physiology of the sinoatrial node - a contemporary review. *Pacing and Clinical*  
510 *Electrophysiology* **33**, 1392-1406 (2010).
- 511 23 Hilliard, F. A. *et al.* Flecainide inhibits arrhythmogenic Ca<sup>2+</sup> waves by open state block of  
512 ryanodine receptor Ca<sup>2+</sup> release channels and reduction of Ca<sup>2+</sup> spark mass. *Journal of*  
513 *Molecular and Cellular Cardiology* **48**, 293-301 (2010).
- 514 24 Dobrzynski, H. *et al.* Expression of Kir2.1 and Kir6.2 transgenes under the control of the  $\alpha$ -  
515 MHC promoter in the sinoatrial and atrioventricular nodes in transgenic mice. *Journal of*  
516 *Molecular and Cellular Cardiology* **41**, 855-867 (2006).
- 517 25 Bungler, M. K. *et al.* Mop3 is an essential component of the master circadian pacemaker in  
518 mammals. *Cell* **103**, 1009-1017 (2000).

- 519 26 Ripperger, J. A. & Schibler, U. Rhythmic CLOCK-BMAL1 binding to multiple E-box motifs  
520 drives circadian Dbp transcription and chromatin transitions. *Nat Genet* **38**, 369-374 (2006).
- 521 27 Lee, Y. J., Han, D. H., Pak, Y. K. & Cho, S. H. Circadian regulation of low density  
522 lipoprotein receptor promoter activity by CLOCK/BMAL1, Hes1 and Hes6. *Exp Mol Med* **44**,  
523 642-652 (2012).
- 524 28 Bosnjak, Z. J. & Kampine, J. P. Effects of halothane, enflurane, and isoflurane on the SA  
525 node. *Anesthesiology* **58**, 314-321 (1983).
- 526 29 Skovsted, P. & Saphthavichaiikul, S. The effects of isoflurane on arterial pressure, pulse rate,  
527 autonomic nervous activity, and barostatic reflexes. *Canadian Anaesthetists' Society*  
528 *Journal* **24**, 304-314 (1977).
- 529 30 Ng, G. A., Brack, K. E. & Coote, J. H. Effects of direct sympathetic and vagus nerve  
530 stimulation on the physiology of the whole heart - a novel model of isolated Langendorff  
531 perfused rabbit heart with intact dual autonomic innervation. *Experimental Physiology* **86**,  
532 319-329 (2001).
- 533 31 Basalay, M. V. *et al.* Glucagon-like peptide-1 (GLP-1) mediates cardioprotection by remote  
534 ischaemic conditioning. *Cardiovascular Research* **112**, 669-676 (2016).
- 535 32 Leoni, A. L. *et al.* Chronic heart rate reduction remodels ion channel transcripts in the  
536 mouse sinoatrial node but not in the ventricle. *Physiological Genomics* **24**, 4-12 (2005).
- 537 33 Gehrman, J. *et al.* Electrophysiological characterization of murine myocardial ischemia  
538 and infarction. *Basic Research in Cardiology* **96**, 237-250 (2001).
- 539 34 Berul, C. I. *et al.* Ventricular arrhythmia vulnerability in cardiomyopathic mice with  
540 homozygous mutant Myosin-binding protein C gene. *Circulation* **104**, 2734-2739 (2001).
- 541 35 D'Souza, A. *et al.* Exercise training reduces resting heart rate via downregulation of the  
542 funny channel HCN4. *Nature Communications* **5**, 3775 (2014).
- 543 36 Aschar-Sobbi, R. *et al.* Increased atrial arrhythmia susceptibility induced by intense  
544 endurance exercise in mice requires TNF $\alpha$ . *Nature Communications* **6**, 6018 (2015).
- 545 37 Wang, D. W. *et al.* Propranolol blocks cardiac and neuronal voltage-gated sodium  
546 channels. *Frontiers in Pharmacology* **1**, 144 (2010).
- 547 38 Tamura, A. *et al.* Effects of antiarrhythmic drugs on the hyperpolarization-activated cyclic

- 548 nucleotide-gated channel current. *Journal of Pharmacological Sciences* **110**, 150-159  
549 (2009).
- 550 39 Taylor, E. A. & Turner, P. The distribution of propranolol, pindolol and atenolol between  
551 human erythrocytes and plasma. *British Journal of Clinical Pharmacology* **12**, 543-548  
552 (1981).
- 553 40 Chapman, M. E., Hu, L., Plato, C. F. & Kohan, D. E. Bioimpedance spectroscopy for the  
554 estimation of body fluid volumes in mice. *American Journal of Physiology - Renal  
555 Physiology* **299**, F280-283 (2010).
- 556 41 Tong, M. *et al.* Circadian expressions of cardiac ion channel genes in mouse might be  
557 associated with the central clock in the SCN but not the peripheral clock in the heart.  
558 *Biological Rhythm Research* **44**, 519-530 (2013).
- 559 42 Koike, N. *et al.* Transcriptional architecture and chromatin landscape of the core circadian  
560 clock in mammals. *Science* **338**, 349-354 (2012).
- 561 43 Yamashita, T. *et al.* Circadian variation of cardiac K<sup>+</sup> channel gene expression. *Circulation*  
562 **107**, 1917-1922 (2003).
- 563 44 Jeyaraj, D. *et al.* Circadian rhythms govern cardiac repolarization and arrhythmogenesis.  
564 *Nature* **483**, 96-99 (2012).
- 565 45 Tong, M. Q. *et al.* Circadian expression of connexins in the mouse heart. *Biological Rhythm  
566 Research* **47**, 631-639 (2016).
- 567 46 Schroder, E. A. *et al.* The cardiomyocyte molecular clock, regulation of Scn5a, and  
568 arrhythmia susceptibility. *American Journal of Physiology-Cell Physiology* **304**, C954-965  
569 (2013).
- 570 47 Chen, Y. *et al.* CLOCK-BMAL1 regulate the cardiac L-type calcium channel subunit  
571 CACNA1C through PI3K-Akt signaling pathway. *Canadian Journal of Physiology and  
572 Pharmacology* **94**, 1023-1032 (2016).
- 573 48 Schroder, E. A. *et al.* The cardiomyocyte molecular clock regulates the circadian  
574 expression of Kcnh2 and contributes to ventricular repolarization. *Heart Rhythm* **12**, 1306-  
575 1314 (2015).
- 576 49 Kodama, I. *et al.* Regional differences in the effects of E-4031 within the sinoatrial node.

- 577 *American Journal of Physiology* **276**, H793-H802 (1999).
- 578 50 Oosting, J., Struijker-Boudier, H. A. & Janssen, B. J. Autonomic control of ultradian and  
579 circadian rhythms of blood pressure, heart rate, and baroreflex sensitivity in spontaneously  
580 hypertensive rats. *Journal of hypertension* **15**, 401-410 (1997).
- 581 51 Swoap, S. J. *et al.* Vagal tone dominates autonomic control of mouse heart rate at  
582 thermoneutrality. *American Journal of Physiology-Heart and Circulatory Physiology* **294**,  
583 H1581-1588 (2008).
- 584 52 Kotsis, V. T. *et al.* Impact of cardiac transplantation in 24 hours circadian blood pressure  
585 and heart rate profile. *Transplantation Proceedings* **37**, 2244-2246 (2005).
- 586 53 Idema, R. N. *et al.* Decreased circadian blood pressure variation up to three years after  
587 heart transplantation. *American Journal of Cardiology* **73**, 1006-1009 (1994).
- 588 54 Ptaszynski, P. *et al.* The effect of ivabradine administration on the night drop of heart rate in  
589 patients with inappropriate sinus tachycardia. *Journal of the American College of*  
590 *Cardiology* **71**, 392-392 (2018).
- 591 55 Grigoryan, S., Hazarapetyan, L. G. & Kocharyan, S. P. The influence of ivabradine on  
592 circadian pattern of heart rate and ischemic episodes in patients with ischemic heart  
593 disease and heart failure. *European Heart Journal* **35**, 1012-1012 (2014).
- 594 56 Bray, M. S. *et al.* Disruption of the circadian clock within the cardiomyocyte influences  
595 myocardial contractile function, metabolism, and gene expression. *American Journal of*  
596 *Physiology-Heart and Circulatory Physiology* **294**, H1036-1047 (2008).
- 597 57 Durgan, D. J. *et al.* The intrinsic circadian clock within the cardiomyocyte. *American Journal*  
598 *of Physiology-Heart and Circulatory Physiology* **289**, H1530-1541 (2005).
- 599 58 Beesley, S., Noguchi, T. & Welsh, D. K. Cardiomyocyte circadian oscillations are cell-  
600 autonomous, amplified by  $\beta$ -adrenergic signaling, and synchronized in cardiac ventricle  
601 tissue. *PLoS One* **11**, e0159618 (2016).
- 602 59 Gula, L. J., Krahn, A. D., Skanes, A. C., Yee, R. & Klein, G. J. Clinical relevance of  
603 arrhythmias during sleep: guidance for clinicians. *Heart* **90**, 347-352 (2004).
- 604 60 Alboni, P., Holz, A. & Brignole, M. Vagally mediated atrioventricular block: pathophysiology  
605 and diagnosis. *Heart* **99**, 904-908 (2013).

- 606 61 Manfredini, R. *et al.* Morning preference in onset of symptomatic third-degree  
607 atrioventricular heart block. *Chronobiology international* **19**, 785-791 (2002).
- 608 62 Ector, H. *et al.* Bradycardia, ventricular pauses, syncope, and sports. *Lancet* **2**, 591-594  
609 (1984).
- 610 63 Northcote, R. J., Rankin, A. C., Scullion, R. & Logan, W. Is severe bradycardia in veteran  
611 athletes an indication for a permanent pacemaker? *British Medical Journal* **298**, 231-232  
612 (1989).
- 613 64 Yamaguchi, S. *et al.* The 5' upstream region of mPer1 gene contains two promoters and is  
614 responsible for circadian oscillation. *Current Biology* **10**, 873-876 (2000).
- 615 65 Kharche, S., Yu, J., Lei, M. & Zhang, H. A mathematical model of action potentials of  
616 mouse sinoatrial node cells with molecular bases. *American Journal of Physiology* **301**  
617 (2011).
- 618

619

## FIGURE LEGENDS

620 **Figure 1. Circadian rhythm in heart rate and other ECG parameters.** Circadian rhythm of heart  
621 rate, PR interval, QRS duration, QT interval and physical activity (measured using telemetry) in  
622 conscious mice (n=9) over ~6 days. Light and shaded regions represent light and dark phases in  
623 this and all similar figures – there was a 12 h light/12 h dark cycle for the first three days and  
624 constant darkness subsequently. Timing of 1 h light pulses shown. In this and all similar figures,  
625 means±SEM are shown and data are fit with a standard sine wave shown in red.

626

627 **Figure 2. Circadian rhythm in intrinsic heart rate, local circadian clock in sinus node, and**  
628 **circadian rhythm in expression of ion channels and other molecules underlying pacemaker**  
629 **activity of sinus node. A,** Intrinsic heart rate measured from the Langendorff-perfused heart  
630 isolated at ZT 0 and ZT 12 (n=9 and 8 mice). \*P<0.05; two-tailed unpaired t test with Welch's  
631 correction. **B,** Corrected sinus node recovery time (cSNRT) at three pacing cycle lengths  
632 measured from the Langendorff-perfused heart isolated at ZT 0 and ZT 12 (n=9 and 8 mice). \*ZT  
633 12 versus ZT 0, P<0.05; two-way ANOVA with Holm-Šídák post-hoc test. **C,** Relative expression of  
634 transcripts encoding key clock components in the sinus node at ZT 12 (as compared to ZT 0; n=7  
635 and 9 mice). The vertical line corresponds to 1, i.e. no change. Values <1 correspond to a  
636 decrease at ZT 12 and >1 an increase. \*ZT 12 versus ZT 0, P<0.05; limma test followed by  
637 Benjamini-Hochberg False Discovery Rate correction (set at 5%). **D and E,** Expression of *Bmal1*  
638 and *Clock* mRNA in the sinus node at four time points over 24 h (n=6 mice for ZT 0; n=6 for ZT 6;  
639 n=7 for ZT 12; n=8 for ZT 18). **F,** *Per1* activity (reported by luciferase bioluminescence) in the  
640 isolated sinus node from *Per1::LUC* mice on a *Cry1<sup>+/+</sup>Cry2<sup>+/+</sup>* or *Cry1<sup>-/-</sup>Cry2<sup>-/-</sup>* background. Similar  
641 data obtained from two other *Cry1<sup>+/+</sup>Cry2<sup>+/+</sup>* mice and two other *Cry1<sup>-/-</sup>Cry2<sup>-/-</sup>* mice. **G,** Relative  
642 expression of transcripts encoding ion channels, Na<sup>+</sup>-K<sup>+</sup> pump subunits, intracellular Ca<sup>2+</sup>-handling  
643 molecules, gap junction channels and key transcription factors in the sinus node at ZT 12 (as  
644 compared to ZT 0; n=7 and 9 mice). \*ZT 12 versus ZT 0, P<0.05; Limma test followed by  
645 Benjamini-Hochberg False Discovery Rate correction (set at 5%).

646

647 **Figure 3. Diurnal rhythm in *Hcn4* mRNA and protein in sinus node. A,** Expression of *Hcn4*



648 mRNA in the sinus node at six time points over 24 h (n=6 mice for ZT 0; n=6 for ZT 4; n=7 for ZT 8;  
649 n=7 for ZT 12; n=7 for ZT 16; n=5 for ZT 20). **B**, Western blot for HCN4 and the housekeeper,  $\beta$ -  
650 actin, in the sinus node of 5 mice culled at ZT 0 and 5 mice culled at ZT 12. **C**, Mean HCN4 protein  
651 expression (relative to the expression of the housekeeper) in the sinus node determined by  
652 western blot at ZT 0 and ZT 12. \* $P < 0.05$ ; two-tailed unpaired t test with Welch's correction. **D**,  
653 Immunolabelling of HCN4 protein (red signal) in sections through the sinus node dissected from  
654 control wild-type (top) and cardiac-specific *Bmal1* knockout mice culled at ZT 0 and ZT 12. **E**,  
655 Mean HCN4 protein expression determined by immunohistochemistry in the sinus node of control  
656 wild-type and cardiac-specific *Bmal1* knockout mice at ZT 0 and ZT 12 (wild-type mice, n=56/42  
657 sections from 3/3 mice; cardiac-specific *Bmal1* knockout mice, n=38/46 sections from 3/3 mice).  
658 \* $P < 0.05$ ; two-way ANOVA with Holm-Šídák post-hoc test.

659

660 **Figure 4. Circadian rhythm in  $I_f$  in sinus node.** **A**, Families of recordings of  $I_f$  from sinus node  
661 cells made at ZT 2 and ZT 12. **B**, Current-voltage relationships for  $I_f$  recorded at ZT 2 (n=10 cells/3  
662 mice) and ZT 12 (n=16 cells/3 mice). \*ZT 12 versus ZT 0,  $P < 0.05$ ; two-way ANOVA with Holm-  
663 Šídák post-hoc test. **C**, Density of  $I_f$  at -125 mV over 24 h (n=10 cells for ZT 2; n=11 for ZT 3; n=10  
664 for ZT 4; n=12 for ZT 5; n=8 for ZT 6; n=16 for ZT 7; n=14 for ZT 8; n=14 for ZT 9; n=27 for ZT 10;  
665 n=16 for ZT 11; n=16 for ZT 12; n=18 for ZT 13; n=13 for ZT 14; n=15 for ZT 15; n=17 for ZT 16;  
666 n=16 for ZT 17; n=11 for ZT 18; from 24 mice);  $I_f$  density is plotted against the time of recording. **D**,  
667 Amplitude of  $I_f$  at -125 mV over 24 h (from same experiments as for C). **E**,  $C_m$  over 24 h (from  
668 same experiments as for C). **F**, Computed mouse sinus node action potentials at ZT 2 and ZT 12  
669 based on a model incorporating the measured differences in the density of  $I_f$ . **G**, Computed 'heart  
670 rate' of a mouse sinus node cell over 24 h based on a model incorporating the measured  
671 differences in density of  $I_f$ .

672

673 **Figure 5. Effect of block of HCN4 and  $I_f$  on intrinsic heart rate and heart rate *in vivo*.** **A**,  
674 Intrinsic heart rate before and after the application of 2 mM  $\text{Cs}^+$  (top) and change in intrinsic heart  
675 rate after application of  $\text{Cs}^+$  (bottom) measured in the isolated sinus node from wild-type mice  
676 (n=10 mice for ZT 0; n=5 for ZT 6; n=9 for ZT 12; n=4 for ZT 18). **B**, Intrinsic heart rate before and

677 after the application of 2 mM Cs<sup>+</sup> (top) and change in intrinsic heart rate after application of Cs<sup>+</sup>  
678 (bottom) measured in the isolated sinus node from cardiac-specific *Bmal1* knockout mice (n=8  
679 mice for ZT 0; n=5 for ZT 6; n=4 for ZT 12; n=3 for ZT 18). **C**, *In vivo* heart rate of wild-type mice  
680 measured at ZT 0 and ZT 12 before and after the administration of 6 mg/kg ivabradine (n=5 mice  
681 for ZT 0; n=5 for ZT 12). \*P<0.05; two-way ANOVA with Dunnett's post-hoc test. **D**, Change in *in*  
682 *vivo* heart rate after administration of ivabradine (from same experiments as for C). \*P<0.05; two-  
683 tailed paired t-test.

684

685 **Figure 6. Cardiac-specific knockout of *Bmal1* stops or blunts circadian rhythm in *Hcn4* and**  
686 ***I<sub>f</sub>*. **A, B and C**, Expression of *Bmal1*, *Clock* and *Hcn4* mRNA in the sinus node at ZT 0 and ZT 12 in  
687 the sinus node of wild-type mice (n=7 mice for ZT 0 and ZT 12) and cardiac-specific *Bmal1*  
688 knockout mice (n=7 mice for ZT 0 and ZT 12). \*ZT 12 versus corresponding ZT 0, P<0.05; two-way  
689 ANOVA with Tukey's post-hoc test. **D**, Families of recordings of *I<sub>f</sub>* made at ZT 2 and ZT 12 from  
690 sinus node cells isolated from cardiac-specific *Bmal1* knockout mice. **E**, Current-voltage  
691 relationships for *I<sub>f</sub>* recorded at ZT 2 and ZT 12. Data shown in black were obtained from cardiac-  
692 specific *Bmal1* knockout mice (n=15 cells/3 mice at ZT 0; n=16 cells/3 mice at ZT 2). Data shown  
693 in grey were obtained from wild-type mice and have already been shown in Figure 4B. **F**, Density  
694 of *I<sub>f</sub>* recorded at ZT 2 and ZT 12 from sinus node cells isolated from wild-type mice (n=16 cells/4  
695 mice for ZT 2; n=16 cells/5 mice for ZT 12) and cardiac-specific *Bmal1* knockout mice (n=14 cells/3  
696 mice for ZT 2; n=15 cells/3 mice for ZT 12). *I<sub>f</sub>* expressed as a percentage of *I<sub>f</sub>* at ZT 0. \*P<0.05;  
697 two-way ANOVA with Holm-Šídák post-hoc test. **G**, Eight potential E-box binding sites pulled down  
698 on immunoprecipitation of His-tagged BMAL1 from cells transfected with His-tagged *Bmal1*. Data  
699 are normalised to immunoprecipitation from untransfected control cells; the red dashed line equals  
700 one and is the baseline level. \*binding site of interest versus binding site A, P<0.05; n=2; one-way  
701 ANOVA with Dunnett's post-hoc test. **H**, Diagram of the *Hcn4* gene and 20 kb of the 5' flanking  
702 region showing the position of the eight potential E-box binding sites, A-H.**

703

704 **Figure 7. Circadian rhythm in heart rate *in vivo*. **A**, *In vivo* heart rate and physical activity**  
705 measured by telemetry at the times shown during 24 h darkness (subjective day and night is

706 shown) with the exception of a 1 h light pulse delivered towards the start of the day (left) or night  
707 (right). The dotted red lines highlight the heart rate and physical activity at the end of the day-time  
708 light pulse and the red arrows highlight the heart rate and physical activity at the end of the night-  
709 time light pulse. From the same experiment as Figure 1. **B**, *In vivo* heart rate measured from  
710 anaesthetised mice at four time points over 24 h (n=12 mice for ZT 0; n=10 for ZT 6; n=10 for ZT  
711 12; n=10 for ZT 18). **C**, *In vivo* heart rate measured by telemetry at ZT 0 and ZT 12 in sham-  
712 operated and vagotomised rats at baseline (pre-surgery) and at 1, 3 and 7 days post-surgery  
713 \*P<0.05. two-way ANOVA with Sidak's multiple comparisons test. **D**, *In vivo* heart rate measured  
714 from anaesthetised mice at ZT 0 (n=9) and ZT 12 (n=9) before (Control) and after autonomic block  
715 by intraperitoneal injection of 1 mg/kg atropine and 1 mg/kg propranolol. \*ZT 12 versus  
716 corresponding ZT 0, P<0.05; two-way ANOVA with Tukey's post-hoc test. **E**, *In vivo* heart rate  
717 measured from anaesthetised mice at ZT 0 (n=5) and ZT 12 (n=5) before (Control) and after  
718 autonomic block by intraperitoneal injection of 2 mg/kg atropine and 10 mg/kg propranolol. \*ZT 12  
719 versus corresponding ZT 0, P<0.05; two-way ANOVA with Tukey's post-hoc test. **F**, Density of  $I_f$  at  
720 -125 mV measured from 12 sinus node cells (from 3 mice) before and after application of 68.4  $\mu$ M  
721 propranolol. \*P<0.05; paired t test.

*In vivo*

Figure 1

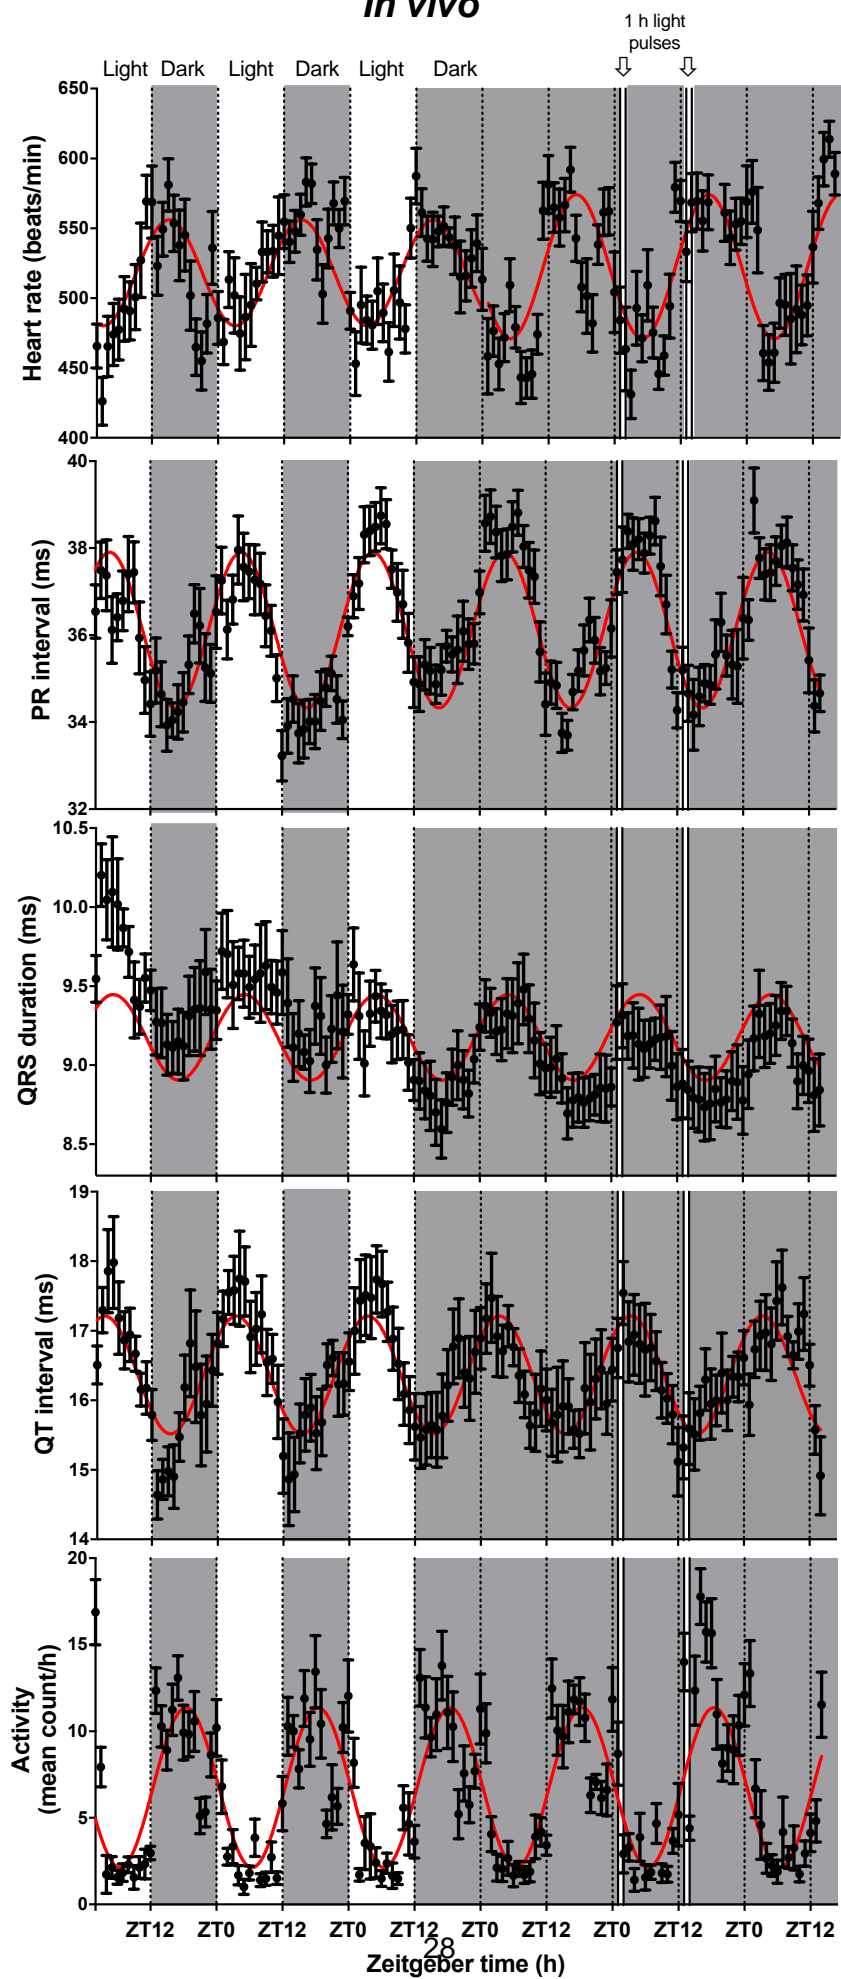

Figure 2

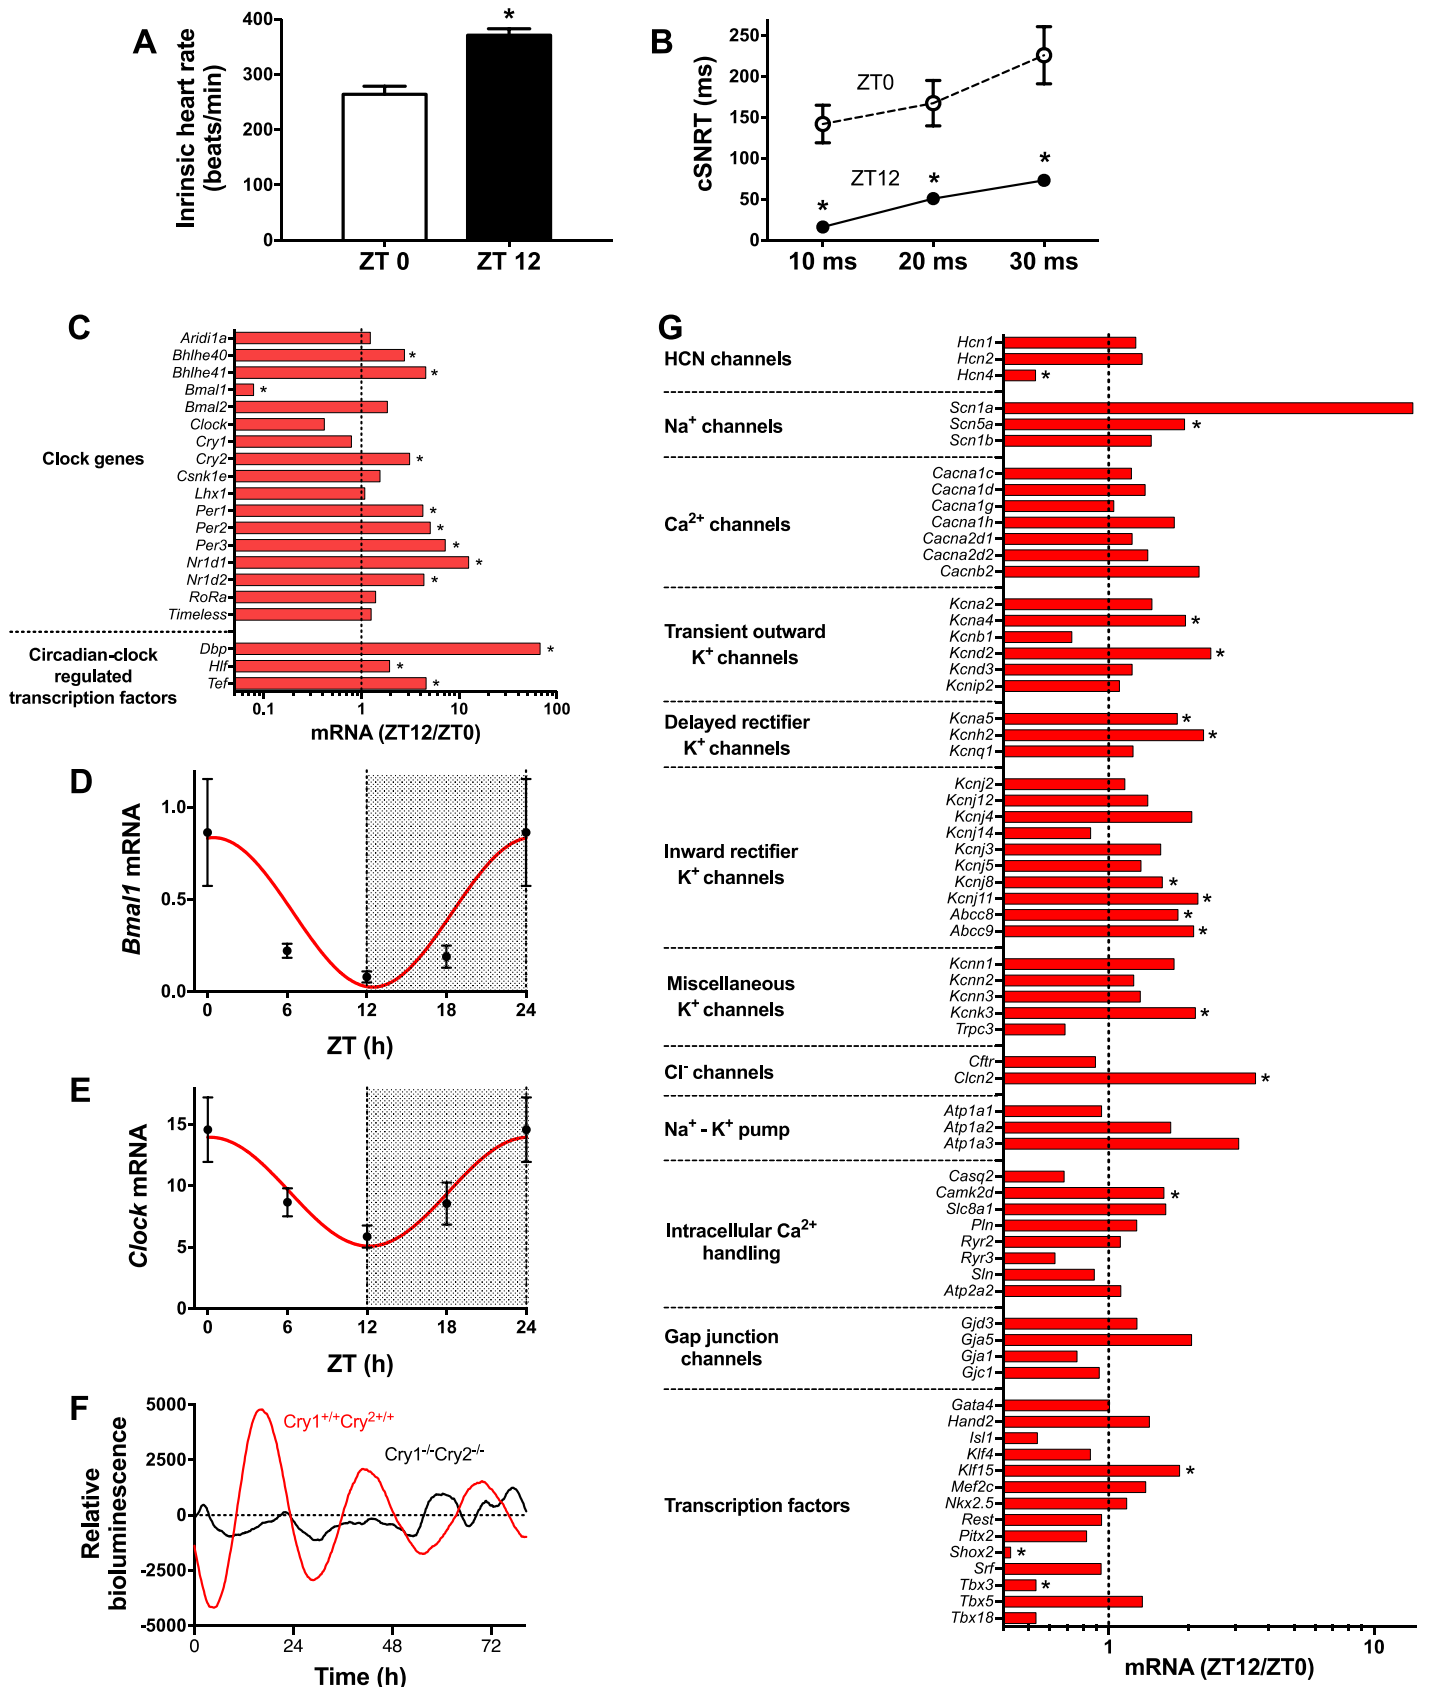

Figure 3

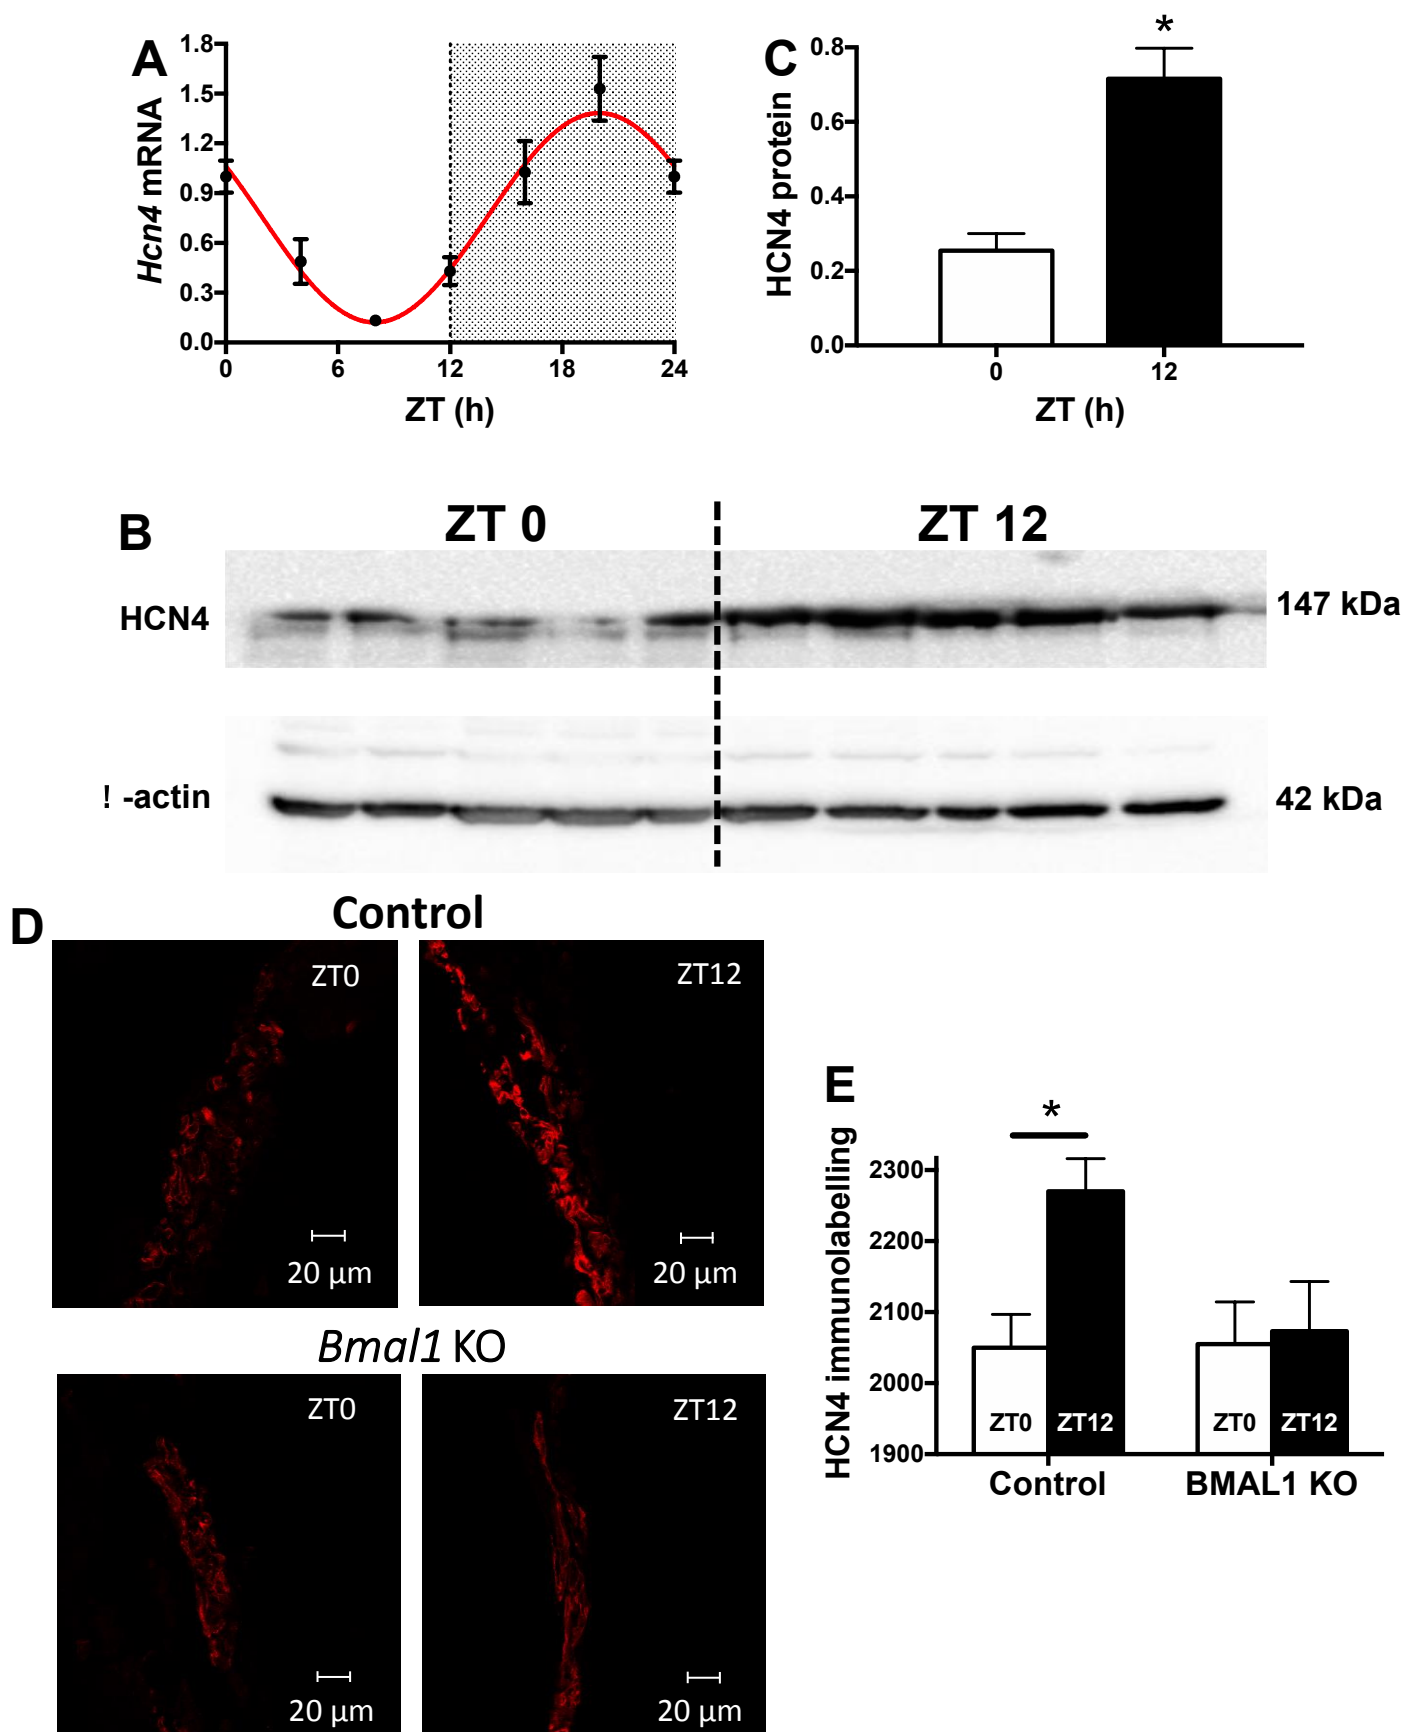

Figure 4

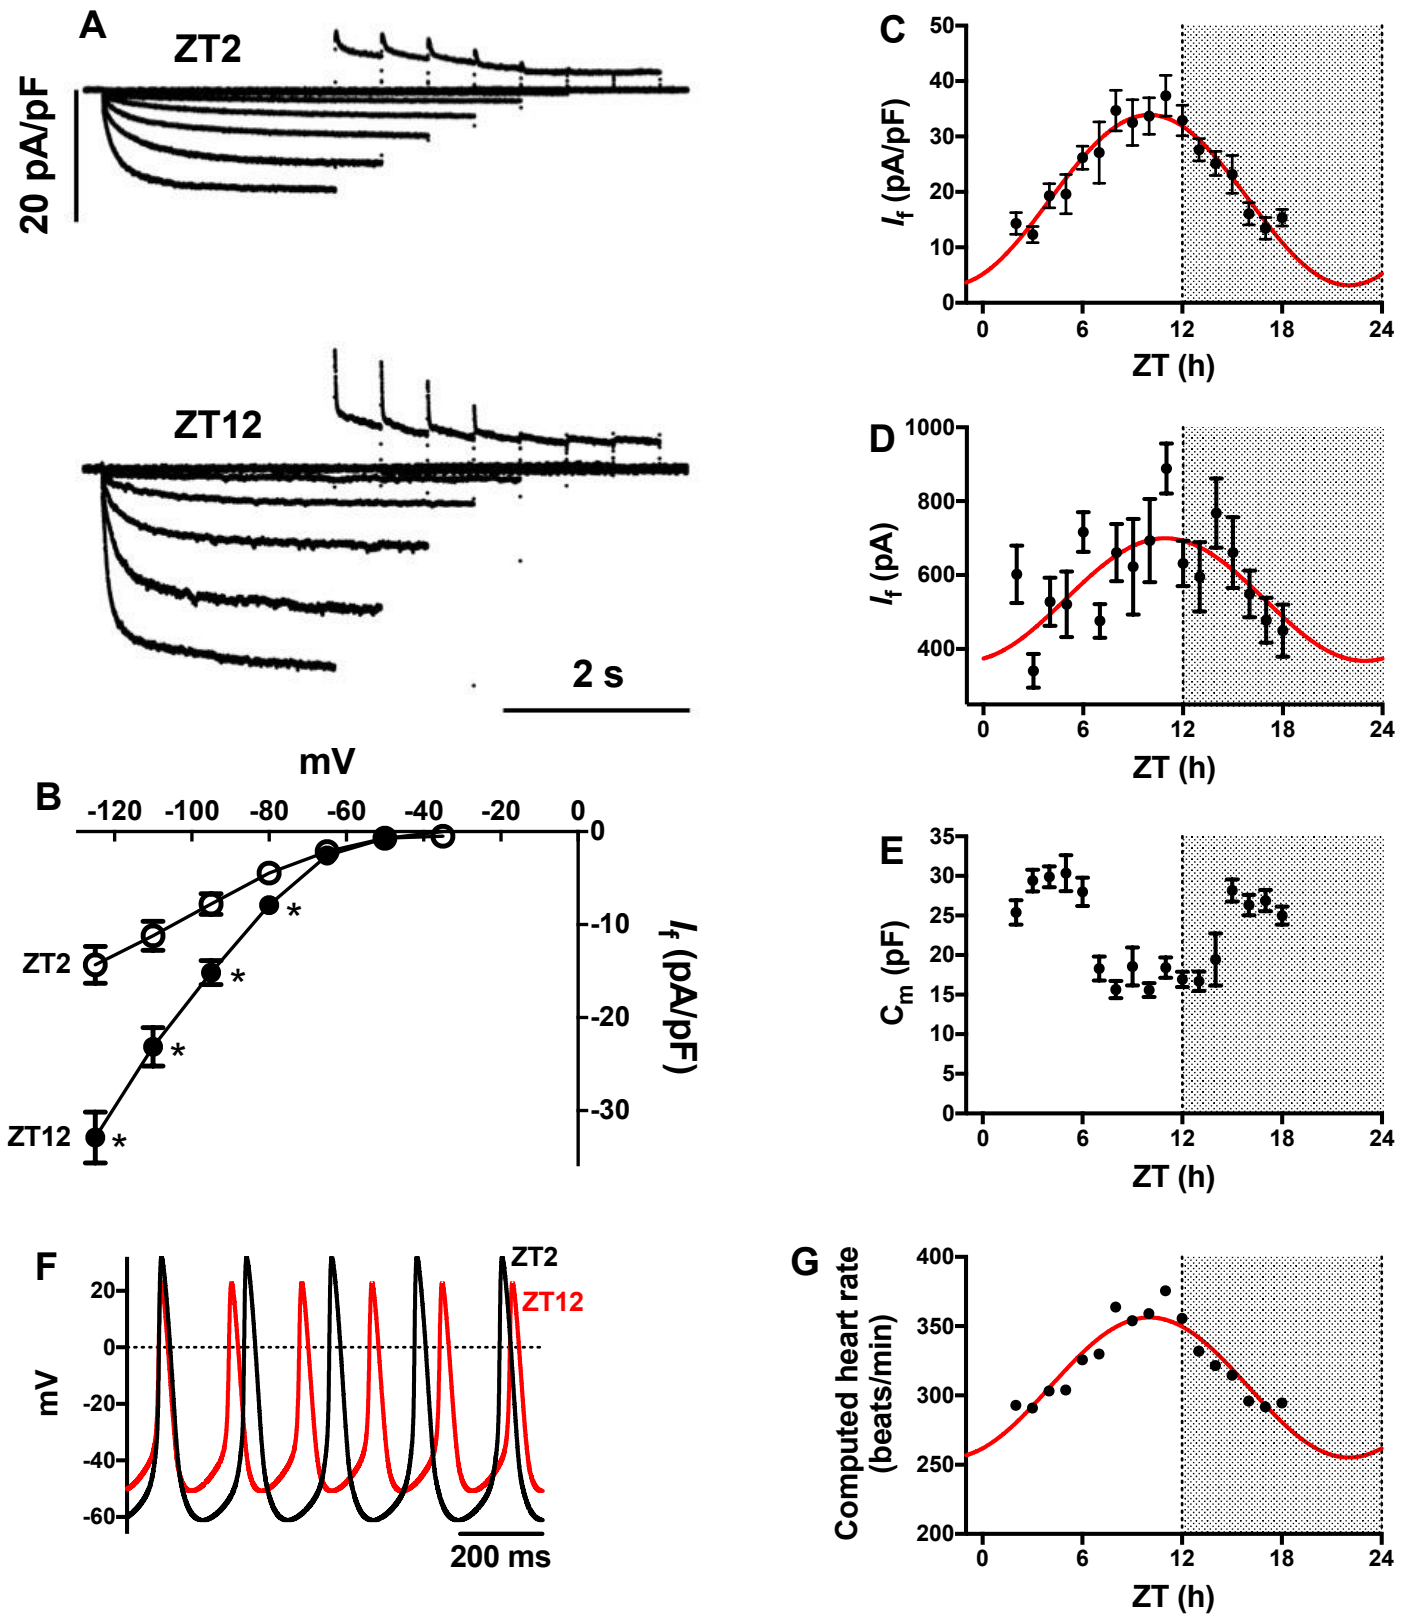

Figure 5

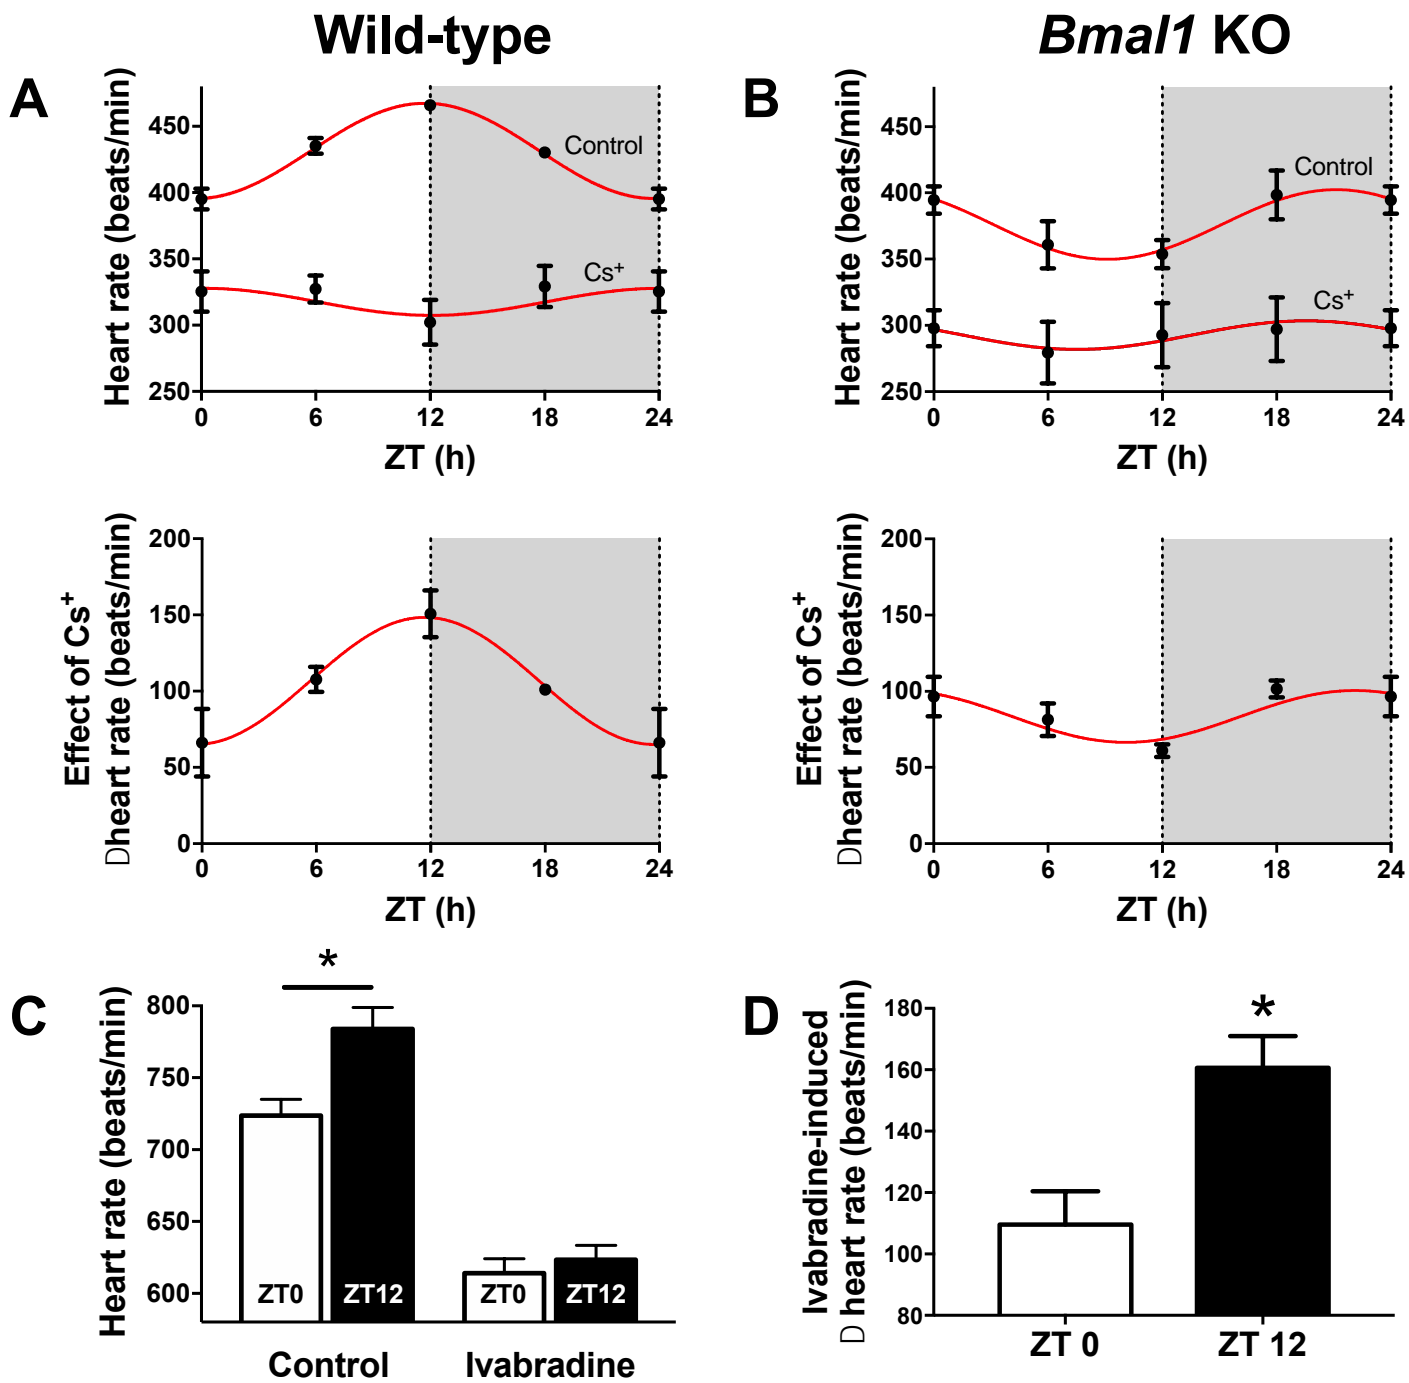



Figure 6

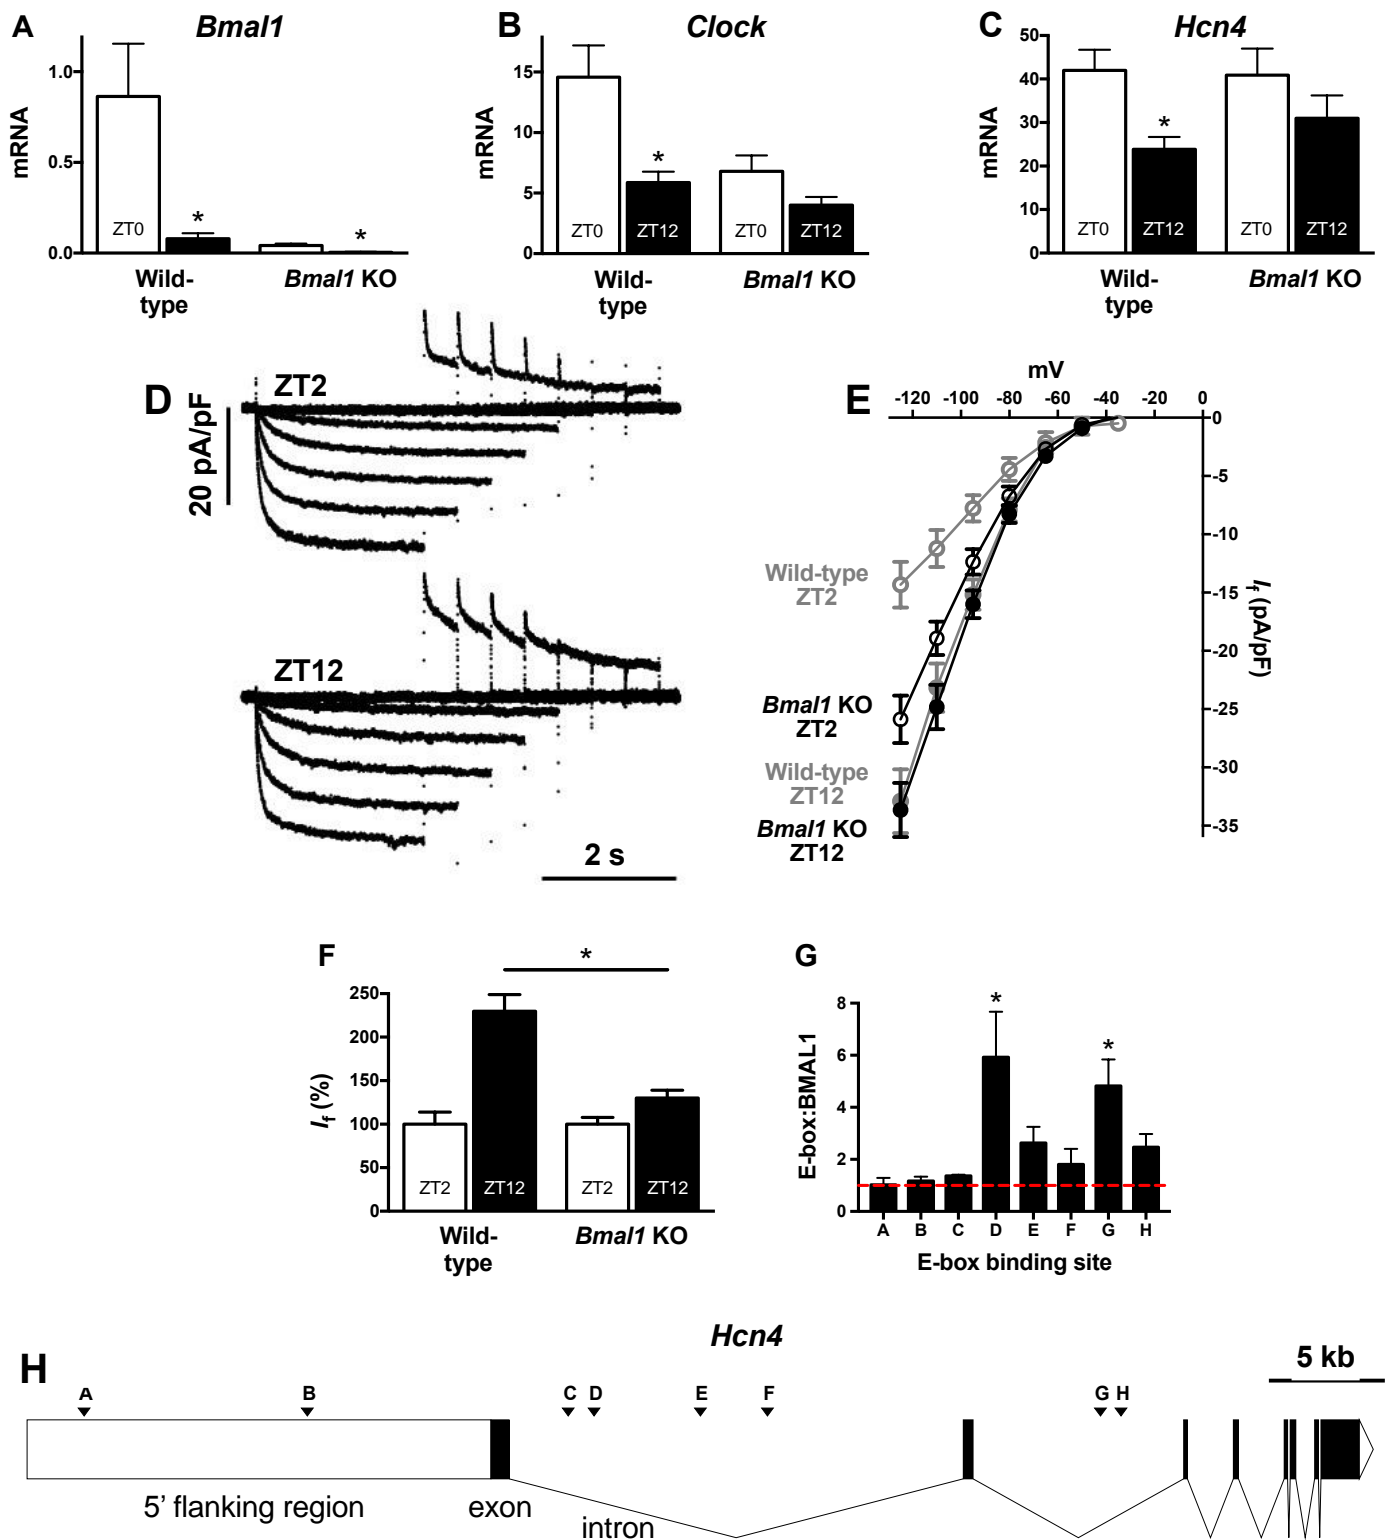

Figure 7

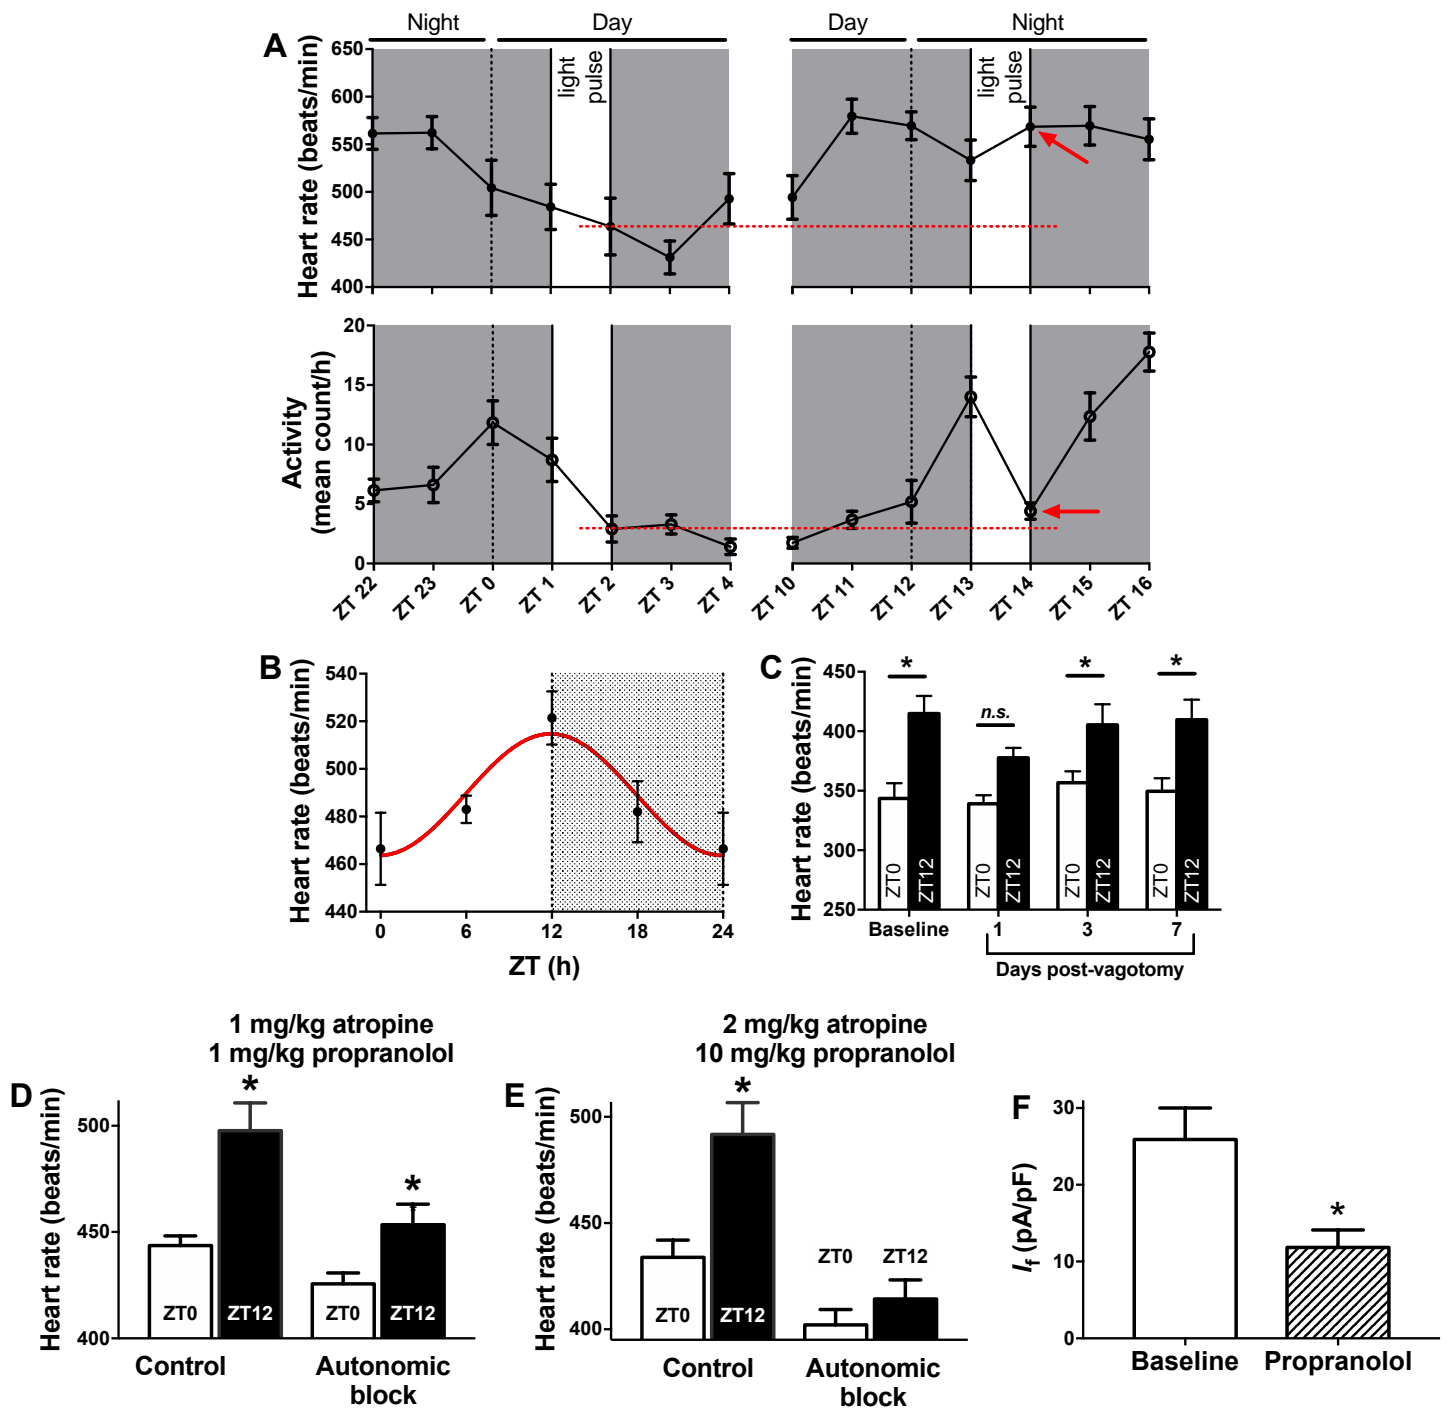

Source: https://biorxiv.org/content/biorxiv/early/2019/06/27/684209.full-text.pdf
